# Supplementary material
Source: publisher figshare collection journal article supplement (https://acs.figshare.com/ndownloader/files/4503397)

## Supporting Information

### Catalytic Allylic C-H Acetoxylation and Benzoyloxylation via Suggested ( $\eta^3$ -Allyl)palladium(IV) Intermediates

Lukasz T. Pilarski, Nicklas Selander, Dietrich Böse and Kálmán J. Szabó\*  
Stockholm University, Arrhenius Laboratory, Department of Organic Chemistry  
SE-106 91 Stockholm, Sweden. E-mail: kalman@organ.su.se. Fax: +46-8-15 49 08

#### Contents:

|                                                                               |     |
|-------------------------------------------------------------------------------|-----|
| 1. General Information                                                        | S2  |
| 2. Experimental Procedures and Spectral Data for <b>4a-4h</b>                 | S2  |
| 3. Catalytic Acetoxylation of Deuterated Cyclohexene                          | S7  |
| 4. Oxidation of Palladium Complex <b>1b</b> Monitored by $^1\text{H}$ NMR     | S8  |
| 5. Oxidation of <b>2a</b> using $\text{PhI}(\text{OAc})_2$ and $\text{LiOBz}$ | S9  |
| 6. References                                                                 | S10 |
| 7. $^1\text{H}$ and $^{13}\text{C}$ NMR spectra of <b>4a-4h</b>               | S11 |

## 1. General Information

Palladium pincer complex **1b**<sup>1</sup>, deuterated substrate **2f-1d**<sup>2,3</sup> and iodonium salt **3b**<sup>4</sup> were prepared according to literature procedures. Glacial acetic acid was distilled prior to use. All other chemicals were obtained from commercial sources and used as received. All reactions were carried out under air. Unless otherwise stated <sup>1</sup>H NMR and <sup>13</sup>C NMR spectra were recorded in CDCl<sub>3</sub> (internal standard: 7.26 ppm, <sup>1</sup>H; 77.00 ppm, <sup>13</sup>C) using a Bruker 400 or 500 MHz spectrometer. <sup>2</sup>H NMR spectrum was recorded in CDCl<sub>3</sub> (internal standard: 7.26 ppm, <sup>1</sup>H) using a Bruker 500 MHz spectrometer. High resolution mass data (HRMS) were obtained using ESI technique. For column chromatography, silica gel (35-70 microns) was used.

## 2. Experimental Procedures and Spectral Data

### General Procedures:

**Procedure A: Acetoxylation of Alkenes (Table 1).** To a 2 mL screw-top glass vial equipped with a magnetic stirring bar were added sequentially: the indicated palladium salt (0.015 mmol, 5 mol%), **3a** (193.3 mg, 0.60 mmol), substrate (0.30 mmol), potassium acetate (29.4 mg, 0.30 mmol) and appropriate solvent (1 mL). The mixture was stirred for 18 h at 40 °C. The crude reaction mixture was diluted with Et<sub>2</sub>O (5 mL), washed with water (3 × 5 mL) and dried (MgSO<sub>4</sub>). The solid residues were washed with Et<sub>2</sub>O (2 × 5 mL) and the combined liquors concentrated under reduced pressure to give the crude products (**4a**, **4c** and **4e-4h**), which were further purified by silica gel chromatography.

**Procedure B: Benzoyloxylation of Alkenes (Table 1).** To a 2 mL screw-top glass vial equipped with a magnetic stirring bar were added sequentially: the indicated

palladium salt (0.015 mmol, 5 mol%), **3b** (267.7 mg, 0.60 mmol), substrate (0.30 mmol), lithium benzoate (38.4 mg, 0.30 mmol) and CH<sub>3</sub>CN (1 mL). The mixture was stirred for 18 h at 40 °C. The crude reaction mixture was diluted with Et<sub>2</sub>O (5 mL), washed sequentially with water (3 × 5 mL) and aqueous NaHCO<sub>3</sub> (0.4 M, 3 mL), and then dried (MgSO<sub>4</sub>). The solid residues were washed with Et<sub>2</sub>O (2 × 5 mL) and the combined liquors concentrated under reduced pressure to give the crude products (**4b** and **4d**), which were further purified by silica gel chromatography.

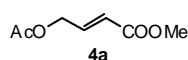

**(E)-Methyl 4-acetoxybut-2-enoate (4a).** General Procedure A. Isolated in 59% yield (27.3 mg) using pentane/Et<sub>2</sub>O 10:1 as eluent for silica gel chromatography. The NMR data obtained for **4a** are in agreement with literature values.<sup>5</sup> **<sup>1</sup>H NMR** (400 MHz, CDCl<sub>3</sub>): δ 6.94 (td, *J* = 4.6, 15.7 Hz, 1H), 6.03 (td, *J* = 2.0, 15.7 Hz, 1H), 4.74 (dd, *J* = 2.0, 4.6 Hz, 2H), 3.76 (s, 3H), 2.12 (s, 3H); **<sup>13</sup>C NMR** (101 MHz, CDCl<sub>3</sub>): δ 170.3, 166.2, 141.4, 121.8, 62.5, 51.7, 20.7; **HRMS** (pos. ESI) *m/z*: calcd for C<sub>7</sub>H<sub>10</sub>NaO<sub>4</sub> [M+Na]<sup>+</sup> 181.0471, found 181.0476.

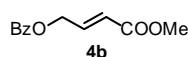

**(E)-Methyl 4-benzoyloxybut-2-enoate (4b).** General Procedure B. Isolated in 64% yield (42.0 mg) using pentane/Et<sub>2</sub>O 10:1 as eluent for silica gel chromatography. **<sup>1</sup>H NMR** (400 MHz, CDCl<sub>3</sub>): δ 8.08 (d, *J* = 7.6 Hz, 2H), 7.59 (t, *J* = 7.6 Hz, 1H), 7.47 (t, *J* = 7.6 Hz, 2H), 7.07 (td, *J* = 4.5, 15.8 Hz, 1H), 6.14 (td, *J* = 2.0, 15.8 Hz, 1H), 5.00 (dd, *J* = 2.0, 4.5 Hz, 2H), 3.76 (s, 3H); **<sup>13</sup>C NMR** (101 MHz, CDCl<sub>3</sub>): δ 166.2, 165.8, 141.5, 133.3, 129.7, 129.5, 128.5, 121.8, 62.9, 51.8; **HRMS** (pos. ESI) *m/z*: calcd for C<sub>12</sub>H<sub>12</sub>NaO<sub>4</sub> [M+Na]<sup>+</sup> 243.0628, found 243.0630.

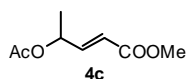

**(E)-Methyl 4-acetoxypent-2-enoate (4c).** General Procedure A.

Isolated in 62% yield (32.0 mg) using pentane/Et<sub>2</sub>O 6:1 as eluent for silica gel chromatography. The NMR data obtained for **4c** are in agreement with literature values.<sup>5</sup> **<sup>1</sup>H NMR** (400 MHz, CDCl<sub>3</sub>):  $\delta$  6.88 (dd,  $J$  = 5.0, 15.8 Hz, 1H), 5.96 (dd,  $J$  = 1.6, 15.8 Hz, 1H), 5.49 (ddq,  $J$  = 1.6, 5.0, 6.6 Hz, 1H), 3.75 (s, 3H), 2.09 (s, 3H), 1.36 (d,  $J$  = 6.6 Hz, 3H); **<sup>13</sup>C NMR** (101 MHz, CDCl<sub>3</sub>):  $\delta$  170.0, 166.5, 146.6, 120.6, 68.8, 51.7, 21.1, 19.6; **HRMS** (pos. ESI)  $m/z$ : calcd for C<sub>8</sub>H<sub>12</sub>NaO<sub>4</sub> [M+Na]<sup>+</sup> 195.0628, found 195.0627.

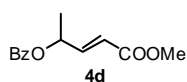

**(E)-Methyl 4-benzoyloxypent-2-enoate (4d).** General Procedure

B. Isolated in 61% yield (42.8 mg) using pentane/Et<sub>2</sub>O 10:1 as eluent for silica gel chromatography. **<sup>1</sup>H NMR** (400 MHz, CDCl<sub>3</sub>):  $\delta$  8.07 (d,  $J$  = 7.6 Hz, 2H), 7.58 (t,  $J$  = 7.6 Hz, 1H), 7.46 (t,  $J$  = 7.6 Hz, 2H), 7.01 (dd,  $J$  = 4.9, 15.8 Hz, 1H), 6.07 (dd,  $J$  = 1.7, 15.8 Hz, 1H), 5.75 (ddq,  $J$  = 1.7, 4.9, 6.7 Hz, 1H), 3.75 (s, 3H), 1.50 (d,  $J$  = 6.7 Hz, 3H); **<sup>13</sup>C NMR** (101 MHz, CDCl<sub>3</sub>):  $\delta$  166.5, 165.5, 146.6, 133.2, 129.9, 129.7, 128.4, 120.6, 69.3, 51.7, 19.7; **HRMS** (pos. ESI)  $m/z$ : calcd for C<sub>13</sub>H<sub>14</sub>NaO<sub>4</sub> [M+Na]<sup>+</sup> 257.0784, found 257.0782.

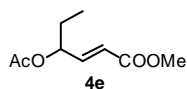

**(E)-Methyl 4-acetoxylhex-2-enoate (4e).** General Procedure A.

Isolated in 61% yield (34.0 mg) using pentane/Et<sub>2</sub>O 10:1 as eluent for silica gel chromatography. The NMR data obtained for **4e** are in agreement with literature values.<sup>5</sup> **<sup>1</sup>H NMR** (400 MHz, CDCl<sub>3</sub>):  $\delta$  6.85 (dd,  $J$  = 5.3, 15.8 Hz, 1H), 5.95 (dd,  $J$  = 1.6, 15.8 Hz, 1H), 5.34 (ddt,  $J$  = 1.6, 5.3, 6.4 Hz, 1H), 3.75 (s, 3H), 2.10 (s, 3H), 1.70 (dq,  $J$  = 6.4, 7.4 Hz, 2H), 0.93 (t,  $J$  = 7.4 Hz, 3H); **<sup>13</sup>C NMR** (101 MHz, CDCl<sub>3</sub>):  $\delta$  170.1, 166.5, 145.5, 121.3, 73.5, 51.7, 26.8, 21.0, 9.2; **HRMS** (pos. ESI)  $m/z$ : calcd for C<sub>9</sub>H<sub>14</sub>NaO<sub>4</sub> [M+Na]<sup>+</sup> 209.0784, found 209.0793.

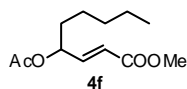

**(E)-Methyl 4-acetoxynon-2-enoate (4f).** General Procedure A.

Isolated in 70% yield (47.9 mg) using pentane/Et<sub>2</sub>O 10:1 as eluent for silica gel chromatography. <sup>1</sup>H NMR (400 MHz, CDCl<sub>3</sub>): δ 6.85 (dd, *J* = 5.4, 15.7 Hz, 1H), 5.94 (dd, *J* = 1.6, 15.7 Hz, 1H), 5.39 (ddt, *J* = 1.6, 5.4, 6.5 Hz, 1H), 3.74 (s, 3H), 2.09 (s, 3H), 1.69-1.61 (m, 2H), 1.36-1.23 (m, 6H), 0.88 (t, *J* = 6.7 Hz, 3H); <sup>13</sup>C NMR (101 MHz, CDCl<sub>3</sub>): δ 170.1, 166.5, 145.8, 121.0, 72.5, 51.7, 33.7, 31.4, 24.6, 22.4, 21.0, 13.9; HRMS (pos. ESI) *m/z*: calcd for C<sub>12</sub>H<sub>20</sub>NaO<sub>4</sub> [M+Na]<sup>+</sup> 251.1254, found 251.1256.

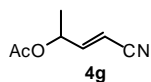

**4-Acetoxypent-2-enenitrile (4g).** General Procedure A. Isolated as a mixture of *trans*-**4g** and *cis*-**4g** (1:1 ratio) in 51% yield (21.6 mg) using

pentane/Et<sub>2</sub>O 10:1 as eluent for silica gel chromatography. The NMR data obtained for **4g** are in agreement with literature values.<sup>6,7</sup> *trans*-**4g**: <sup>1</sup>H NMR (400 MHz, CDCl<sub>3</sub>): δ 6.65 (dd, *J* = 5.0, 16.4 Hz, 1H), 5.54 (dd, *J* = 1.8, 16.4 Hz, 1H), 5.44 (ddq, *J* = 1.8, 5.0, 6.7 Hz, 1H), 2.10 (s, 3H), 1.36 (d, *J* = 6.7 Hz, 3H) <sup>13</sup>C NMR (101 MHz, CDCl<sub>3</sub>): δ 169.7, 152.6, 116.5, 100.2, 68.6, 20.9, 19.3; HRMS (pos. ESI) *m/z*: calcd for C<sub>7</sub>H<sub>9</sub>NNaO<sub>2</sub> [M+Na]<sup>+</sup> 162.0525, found 162.0526. *cis*-**4g**: <sup>1</sup>H NMR (400 MHz, CDCl<sub>3</sub>): δ 6.40 (dd, *J* = 6.7, 11.5 Hz, 1H), 5.65 (ddq, *J* = 1.4, 6.7, 6.7 Hz, 1H), 5.41 (dd, *J* = 1.4, 11.5 Hz, 1H), 2.11 (s, 3H), 1.42 (d, *J* = 6.7 Hz, 3H) <sup>13</sup>C NMR (101 MHz, CDCl<sub>3</sub>): δ 170.0, 152.3, 114.8, 99.6, 68.9, 20.9, 19.6.

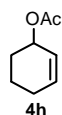

**Cyclohex-2-enyl acetate (4h).** General Procedure A. Isolated in 66% yield (27.6 mg) using pentane/Et<sub>2</sub>O 20:1 as eluent for silica gel chromatography.

The NMR data obtained for **4h** are in agreement with literature values.<sup>8</sup> <sup>1</sup>H NMR (400 MHz, CDCl<sub>3</sub>): δ 5.94 (dtd, *J* = 1.3, 3.8, 10.0 Hz, 1H), 5.72-5.66 (m, 1H), 5.27-5.22 (m, 1H), 2.14-1.93 (m, 2H), 2.04 (s, 3H), 1.91-1.82 (m, 1H), 1.78-1.57 (m, 3H);

**$^{13}\text{C}$  NMR** (101 MHz,  $\text{CDCl}_3$ ):  $\delta$  170.8, 132.6, 125.7, 68.1, 28.3, 24.8, 21.4, 18.8;

**HRMS** (pos. ESI)  $m/z$ : calcd for  $\text{C}_8\text{H}_{12}\text{NaO}_2$   $[\text{M}+\text{Na}]^+$  163.0730, found 163.0732.

### 3. Catalytic Acetoxylation of Deuterated Cyclohexene

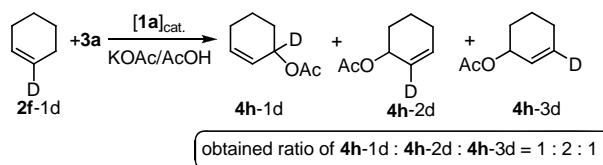

The acetoxylation of **2f-1d** was performed according to General Procedure A. The isotope distribution in product **4h** was determined by integration of the peaks in the  $^2\text{H}$  NMR spectrum shown below. No other deuterated species were detected.

Spectral data for the three isomers:

**4h-1d**:  $^2\text{H}$  NMR (76.8 MHz,  $\text{CDCl}_3$ ):  $\delta$  6.03-5.93 (br s, 1D).

**4h-2d**:  $^2\text{H}$  NMR (76.8 MHz,  $\text{CDCl}_3$ ):  $\delta$  5.80-5.67 (br s, 1D).

**4h-3d**:  $^2\text{H}$  NMR (76.8 MHz,  $\text{CDCl}_3$ ):  $\delta$  5.30-5.20 (br s, 1D).

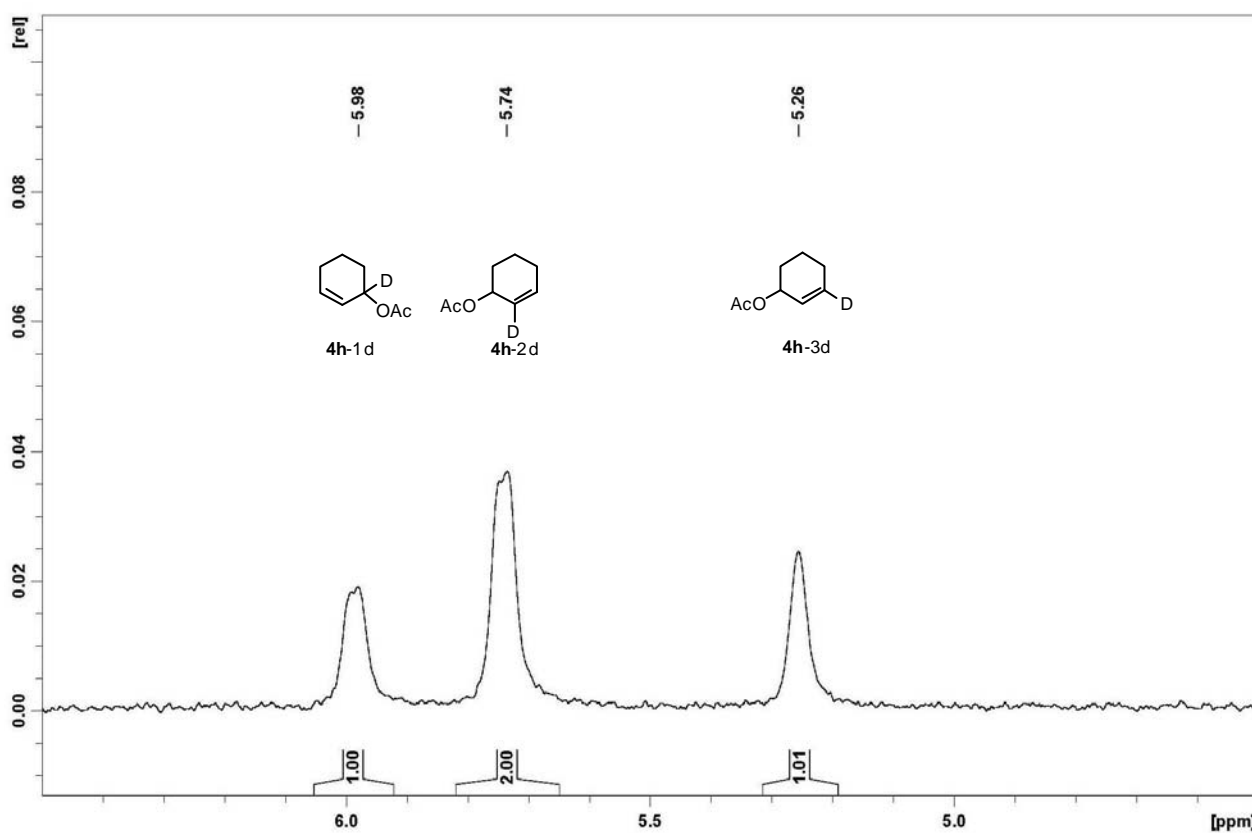

#### 4. Oxidation of Palladium Complex **1b** Monitored by $^1\text{H}$ NMR

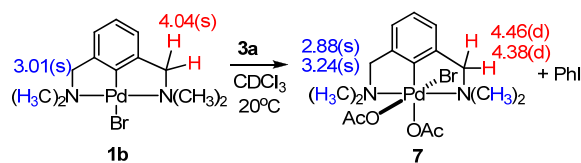

A NMR tube was charged with a solution of palladium complex **1b** (7.6 mg, 0.02 mmol) in  $\text{CDCl}_3$  (0.3 mL). To this solution, iodonium salt **3a** (19.3 mg, 0.06 mmol) was added in  $\text{CDCl}_3$  (0.1 mL). The sample was vigorously shaken to give a homogeneous solution and five minutes thereafter a  $^1\text{H}$  NMR spectrum (shown below) was recorded at room temperature. Approximately 10 minutes later (at room temperature), a second  $^1\text{H}$  NMR spectrum was recorded, showing no peaks assigned to complex **7**. Spectral data for the benzyl and methyl protons of proposed complex **7**:  $^1\text{H}$  NMR (500 MHz,  $\text{CDCl}_3$ ):  $\delta$  4.46 (d,  $J = 13.9$  Hz, 2H, Ar- $\text{CH}_2$ ), 4.38 (d,  $J = 13.9$  Hz, 2H, Ar- $\text{CH}_2$ ), 3.24 (s, 6H,  $\text{NCH}_3$ ), 2.88 (s, 6H,  $\text{NCH}_3$ ).

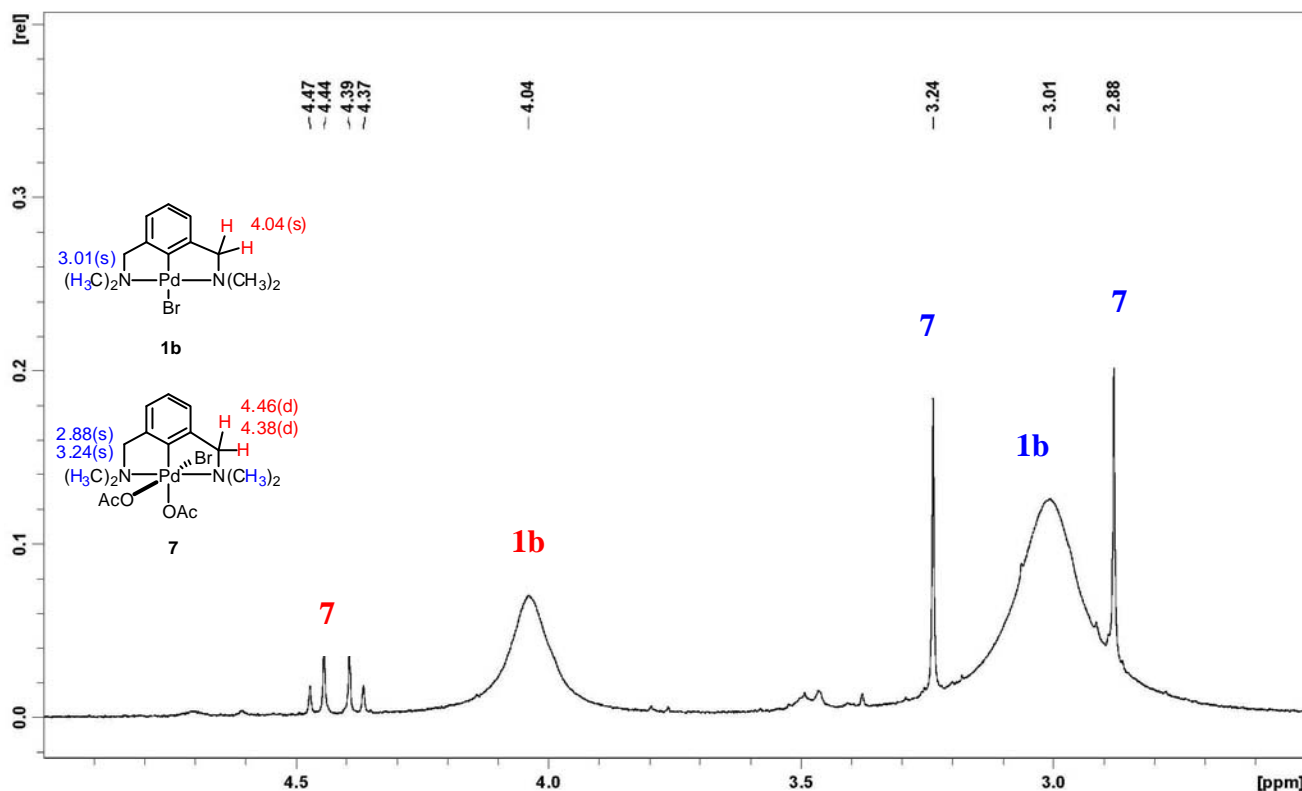



### 5. Oxidation of **2a** using $\text{PhI}(\text{OAc})_2$ and $\text{LiOBz}$

To a 2 mL screw-top glass vial equipped with a magnetic stirring bar were added sequentially:  $\text{Pd}(\text{OAc})_2$  (1.1 mg, 0.005 mmol, 5 mol%), **3a** (64.4 mg, 0.20 mmol), **2a** (10.0 mg, 0.10 mmol), lithium benzoate (12.8 mg, 0.10 mmol) and  $\text{CD}_3\text{CN}$  (0.3 mL). The mixture was stirred for 18 h at 40 °C, filtered through a cotton wool plug and additional  $\text{CD}_3\text{CN}$  (0.2 mL) was added. The product ratio was determined by  $^1\text{H}$  NMR and found to be **4a:4b** 2:1.

## 6. References

- (1) Alsters, P. L.; Baesjou, P. J.; Janssen, M. D.; Kooijman, H.; Sicherer-Roetman, A.; Spek, A. L.; van Koten, G. *Organometallics* **1992**, *11*, 4124.
- (2) Hashimoto, T.; Prakash, G. K. S.; Shih, J. G.; Olah, G. A. *J. Org. Chem.* **1987**, *52*, 931.
- (3) Nägeli, I.; Baud, C.; Bernardinelli, G.; Jacquier, Y.; Moran, M.; Müller, P. *Helv. Chim. Acta.* **1997**, *80*, 1087.
- (4) Stang, P. J.; Boehshar, M.; Wingert, H.; Kitamura, T. *J. Am. Chem. Soc.* **1988**, *110*, 3272.
- (5) Hoffman, R. V.; Severns, B. S. *J. Org. Chem.* **1996**, *61*, 5567.
- (6) Nudelman, A.; Keinan, E. *Synthesis* **1982**, 687.
- (7) Baeza, A.; Casas, J.; Nájera, C.; Sansano, J. M. *J. Org. Chem.* **2006**, *71*, 3837.
- (8) Magens, S.; Ertelt, M.; Jatsch, A.; Plietker, B. *Org. Lett.* **2008**, *10*, 53.

7.  $^1\text{H}$  and  $^{13}\text{C}$  NMR spectra of 4a-4h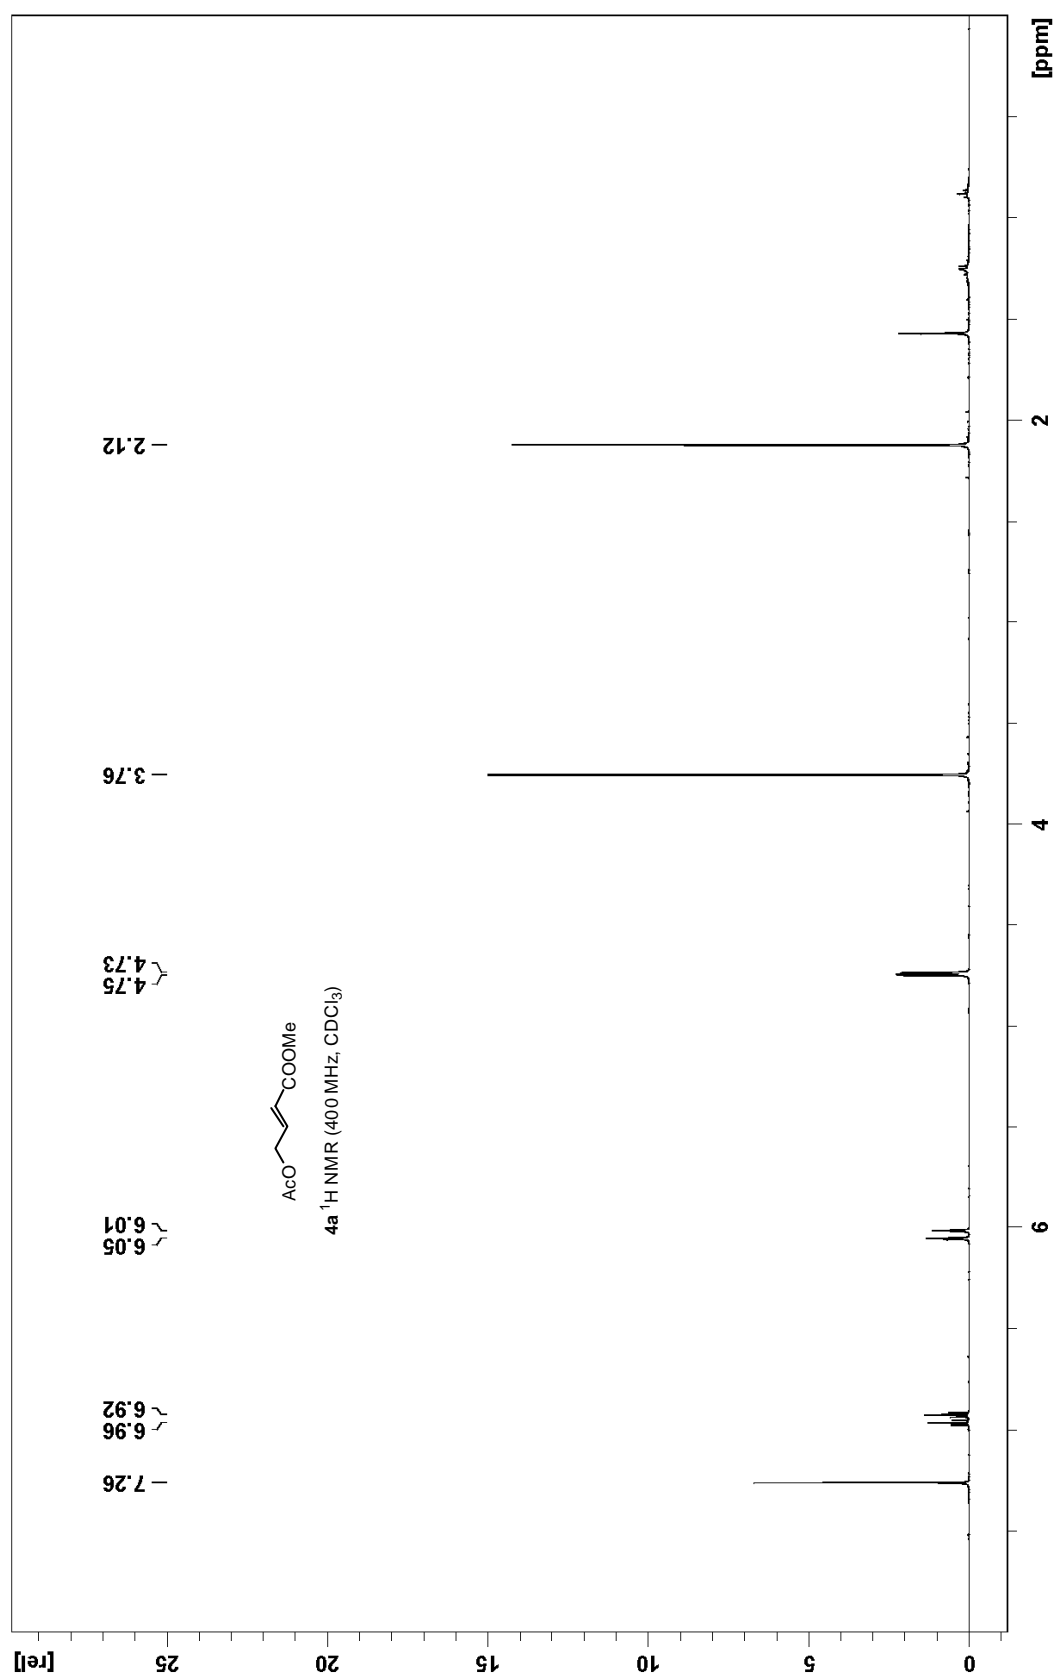

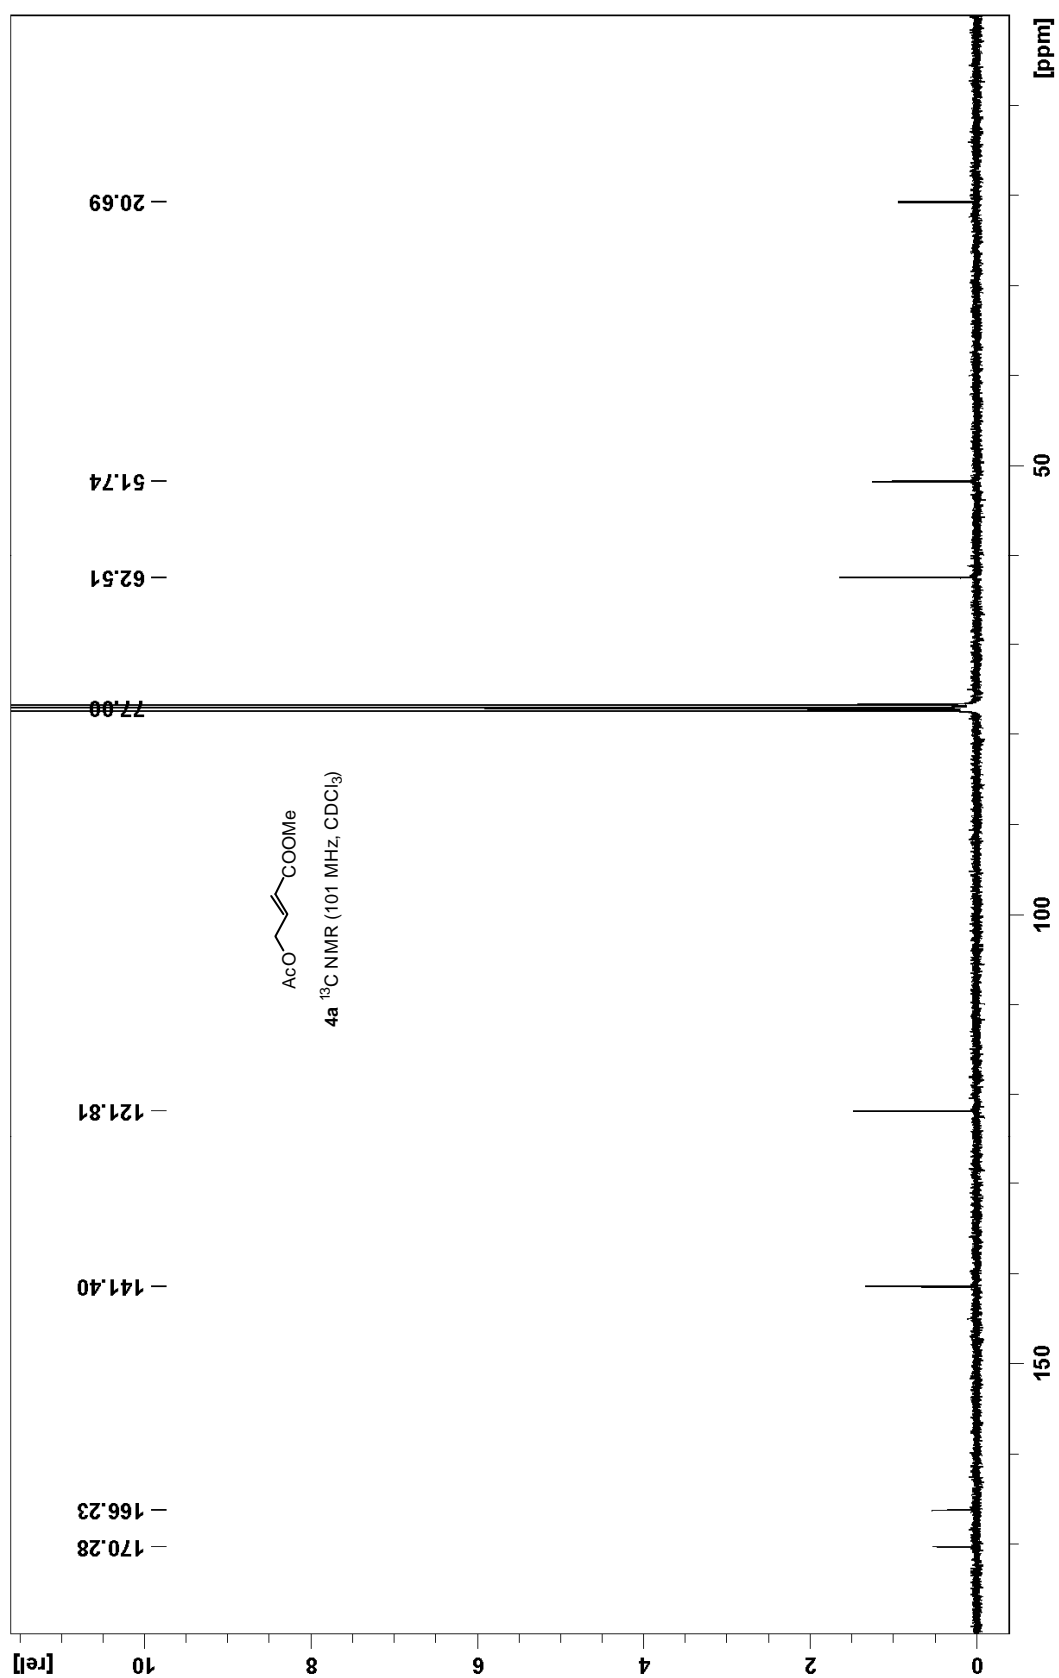

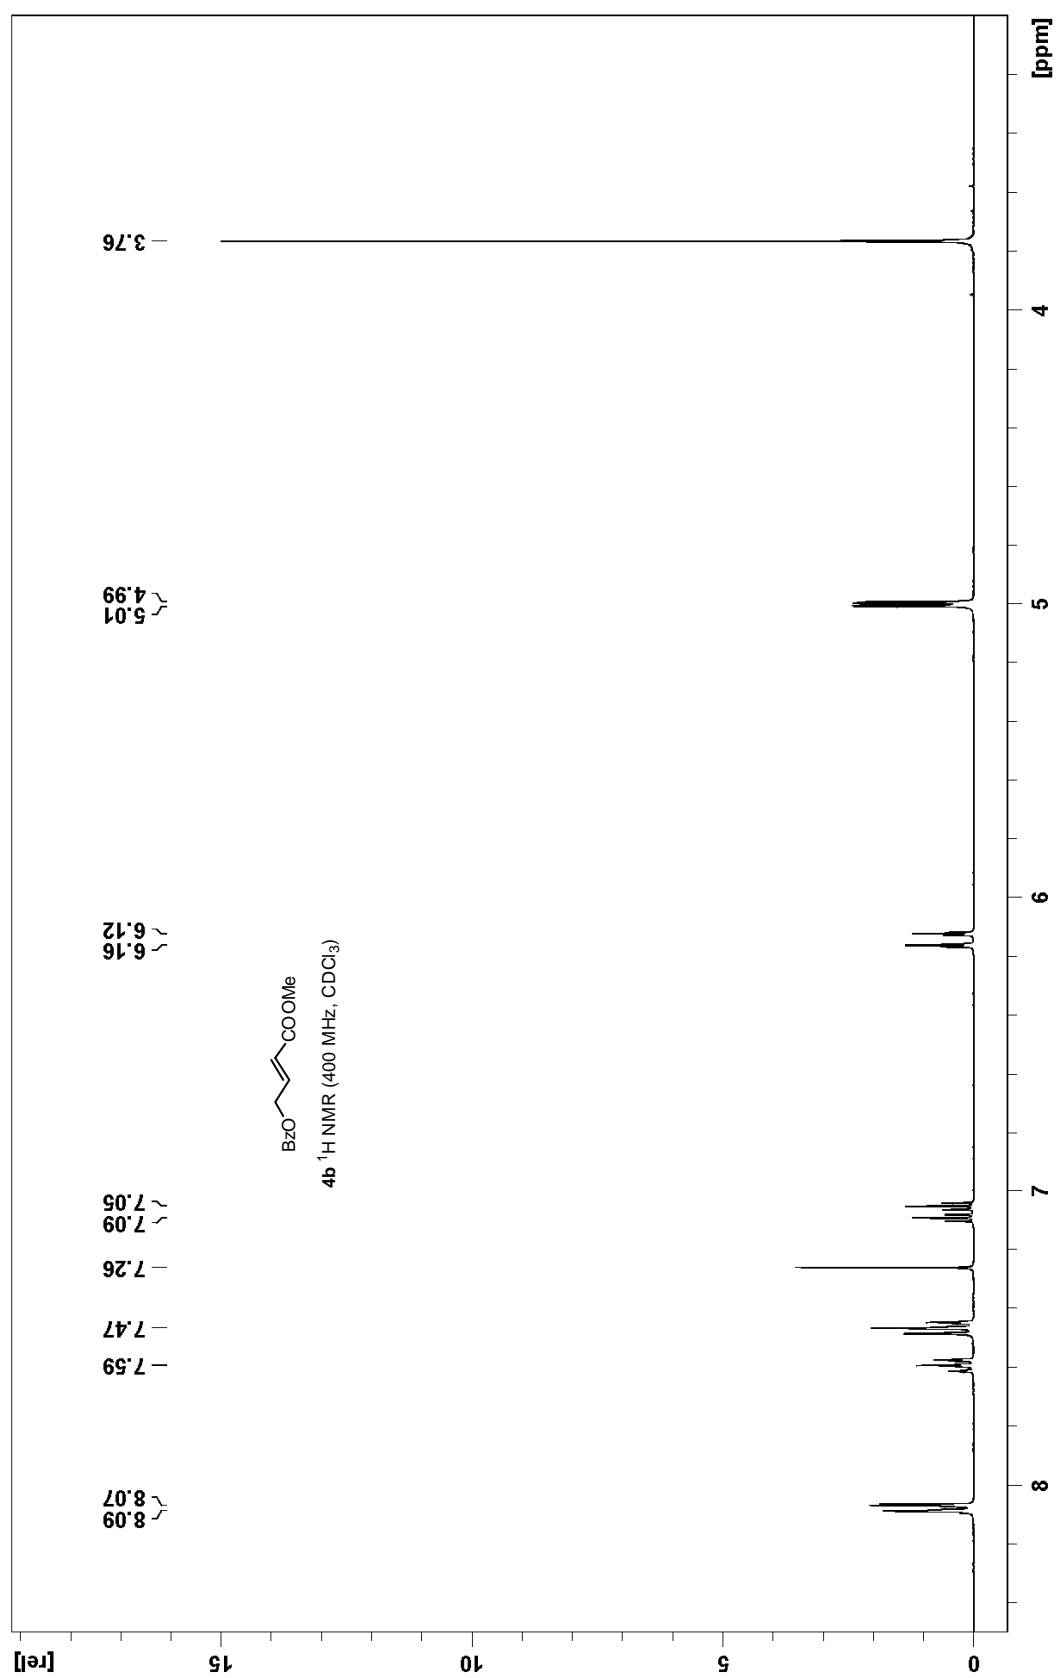

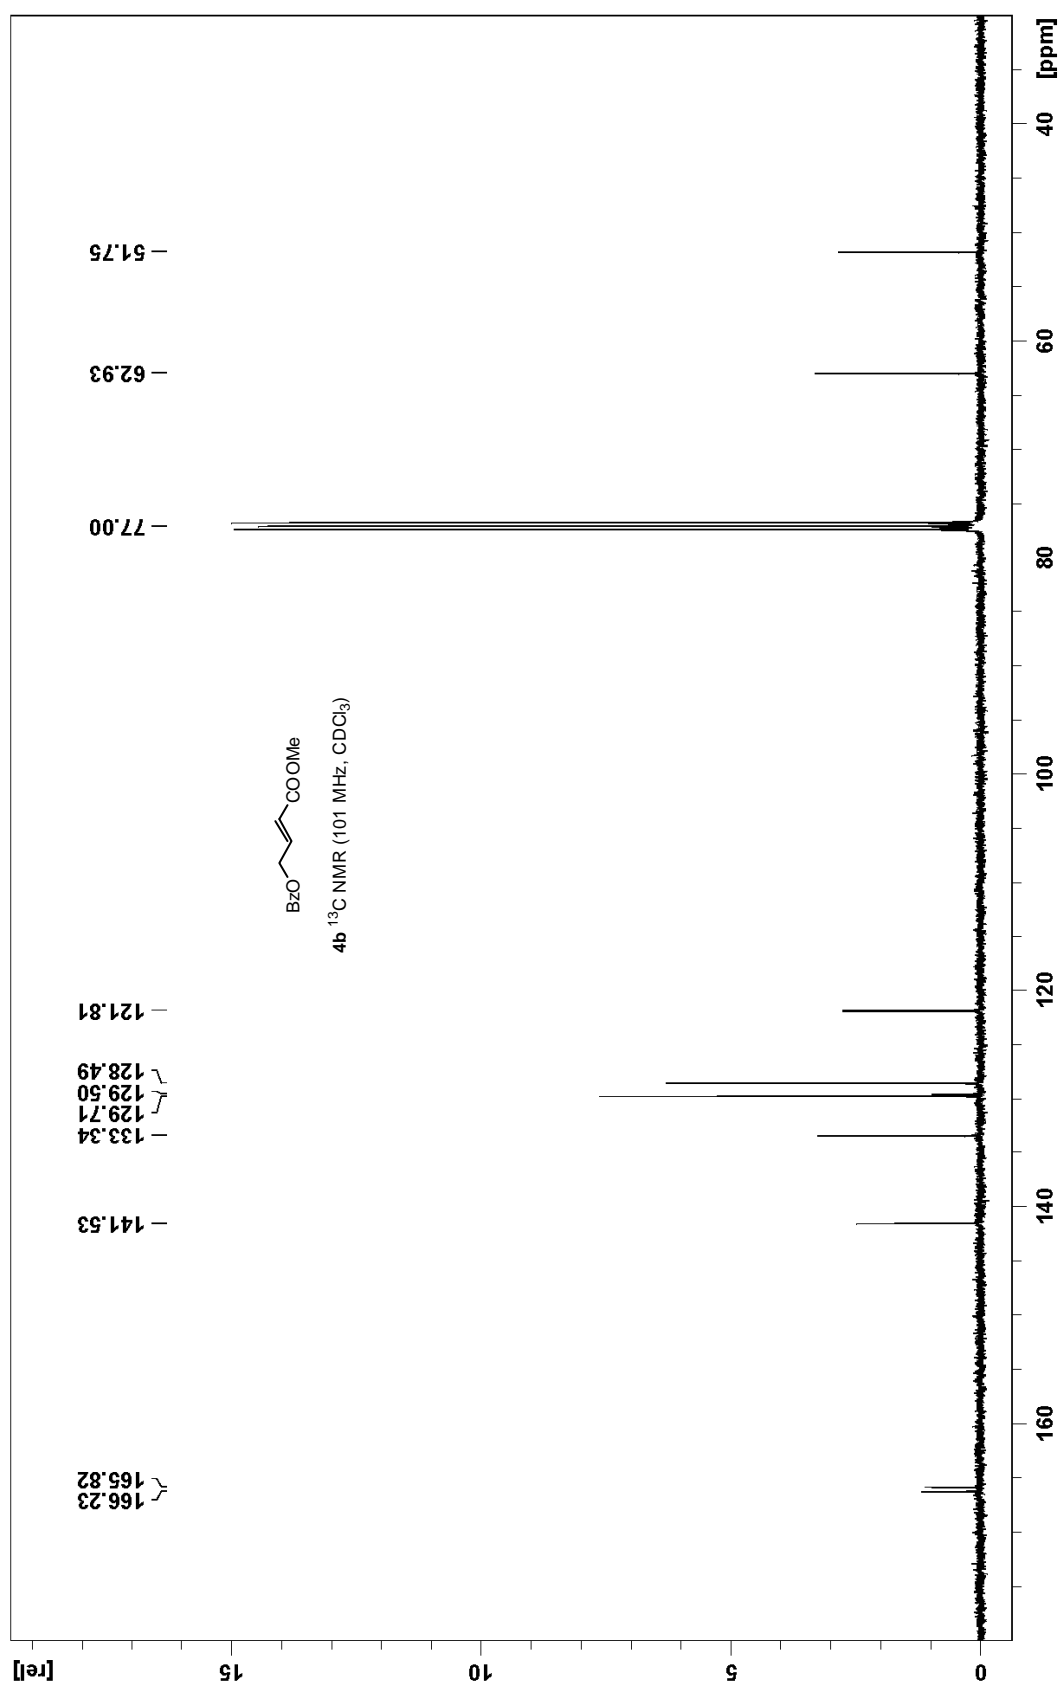

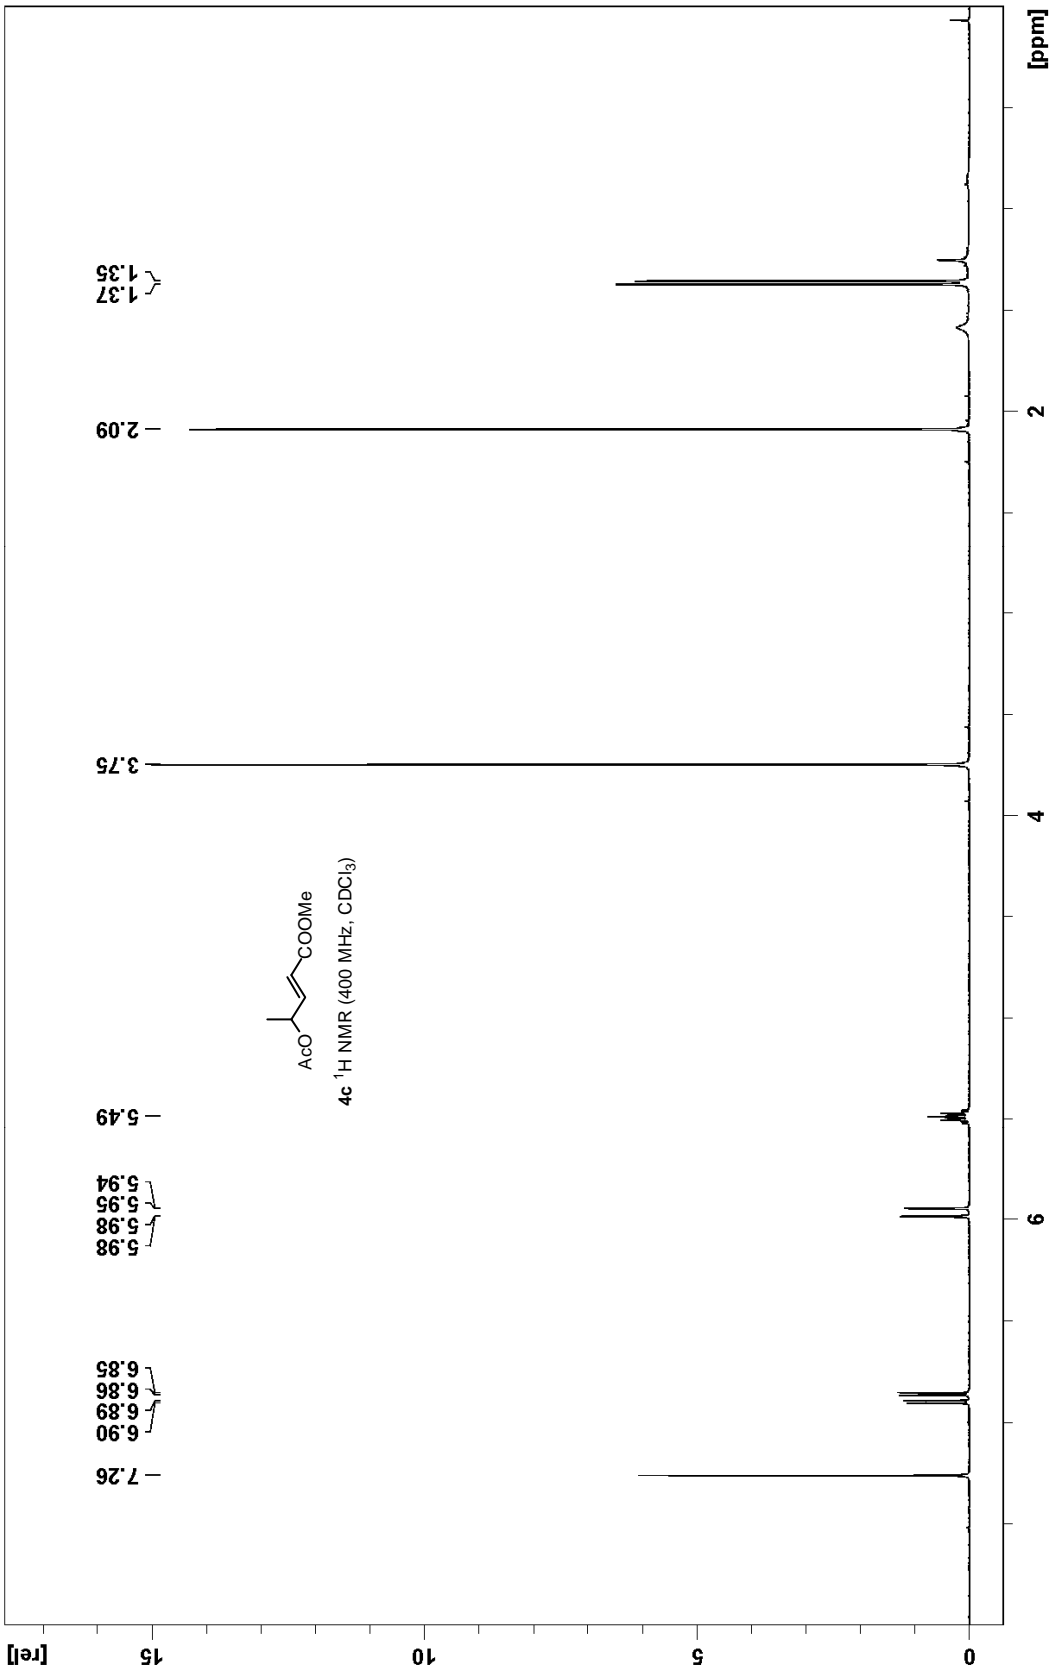

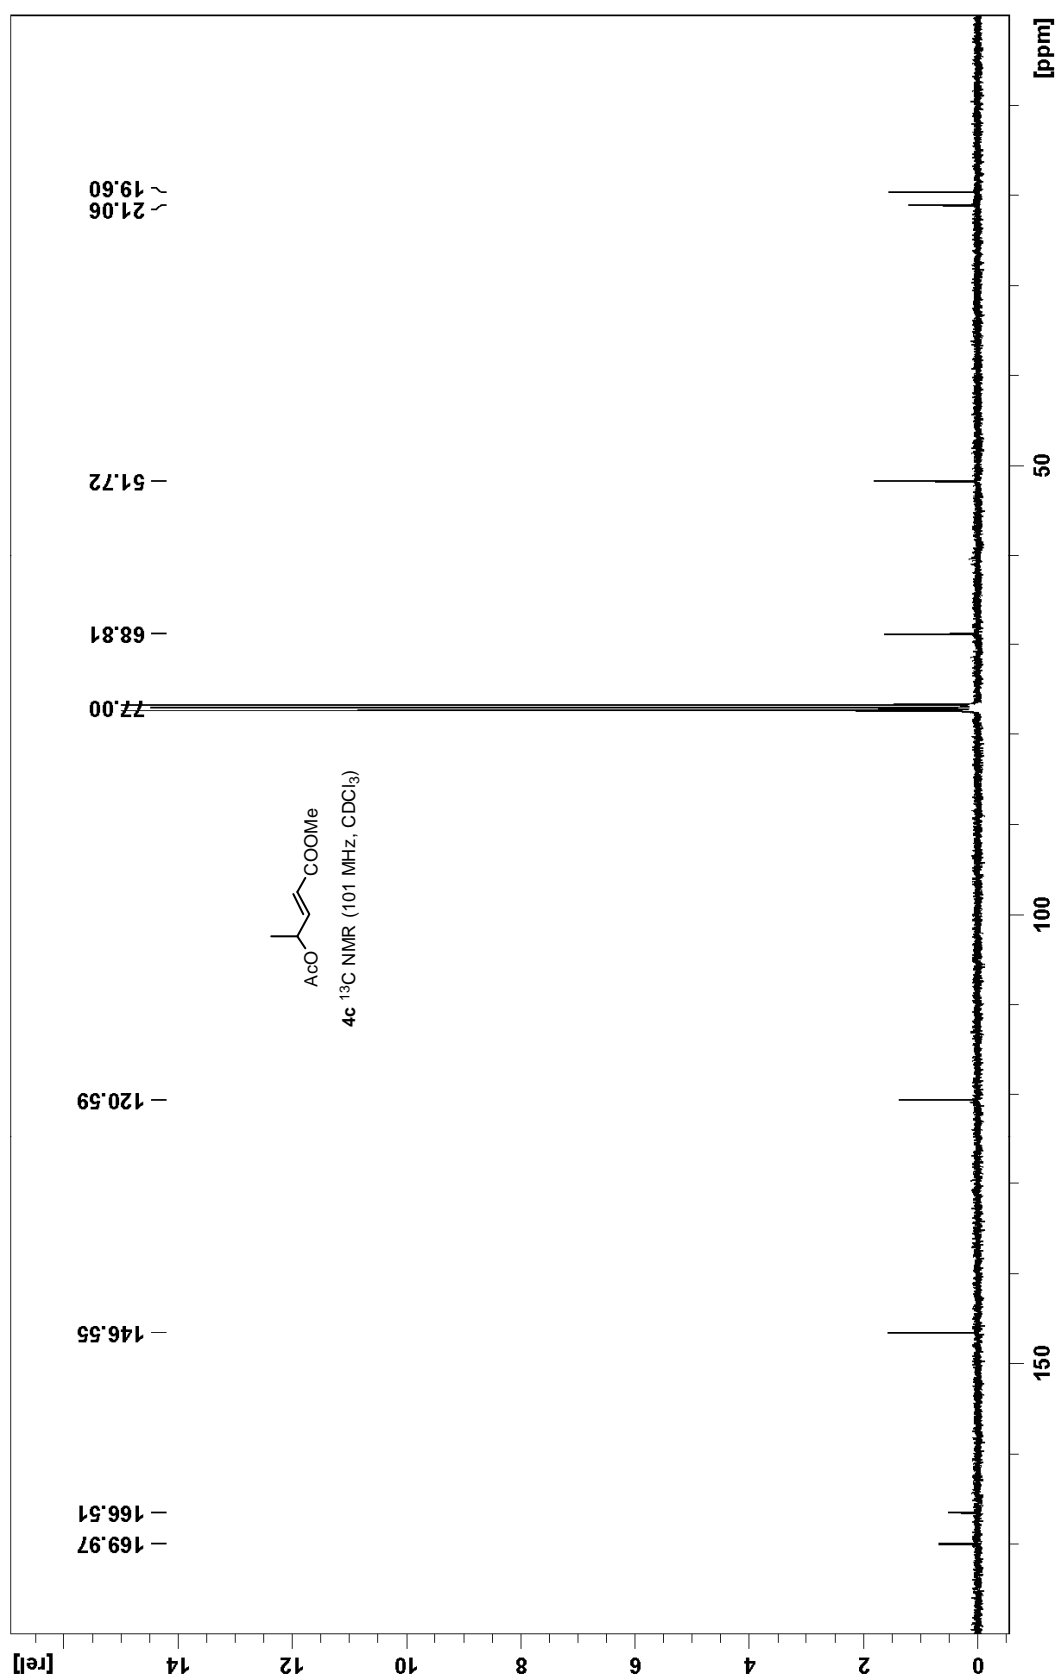



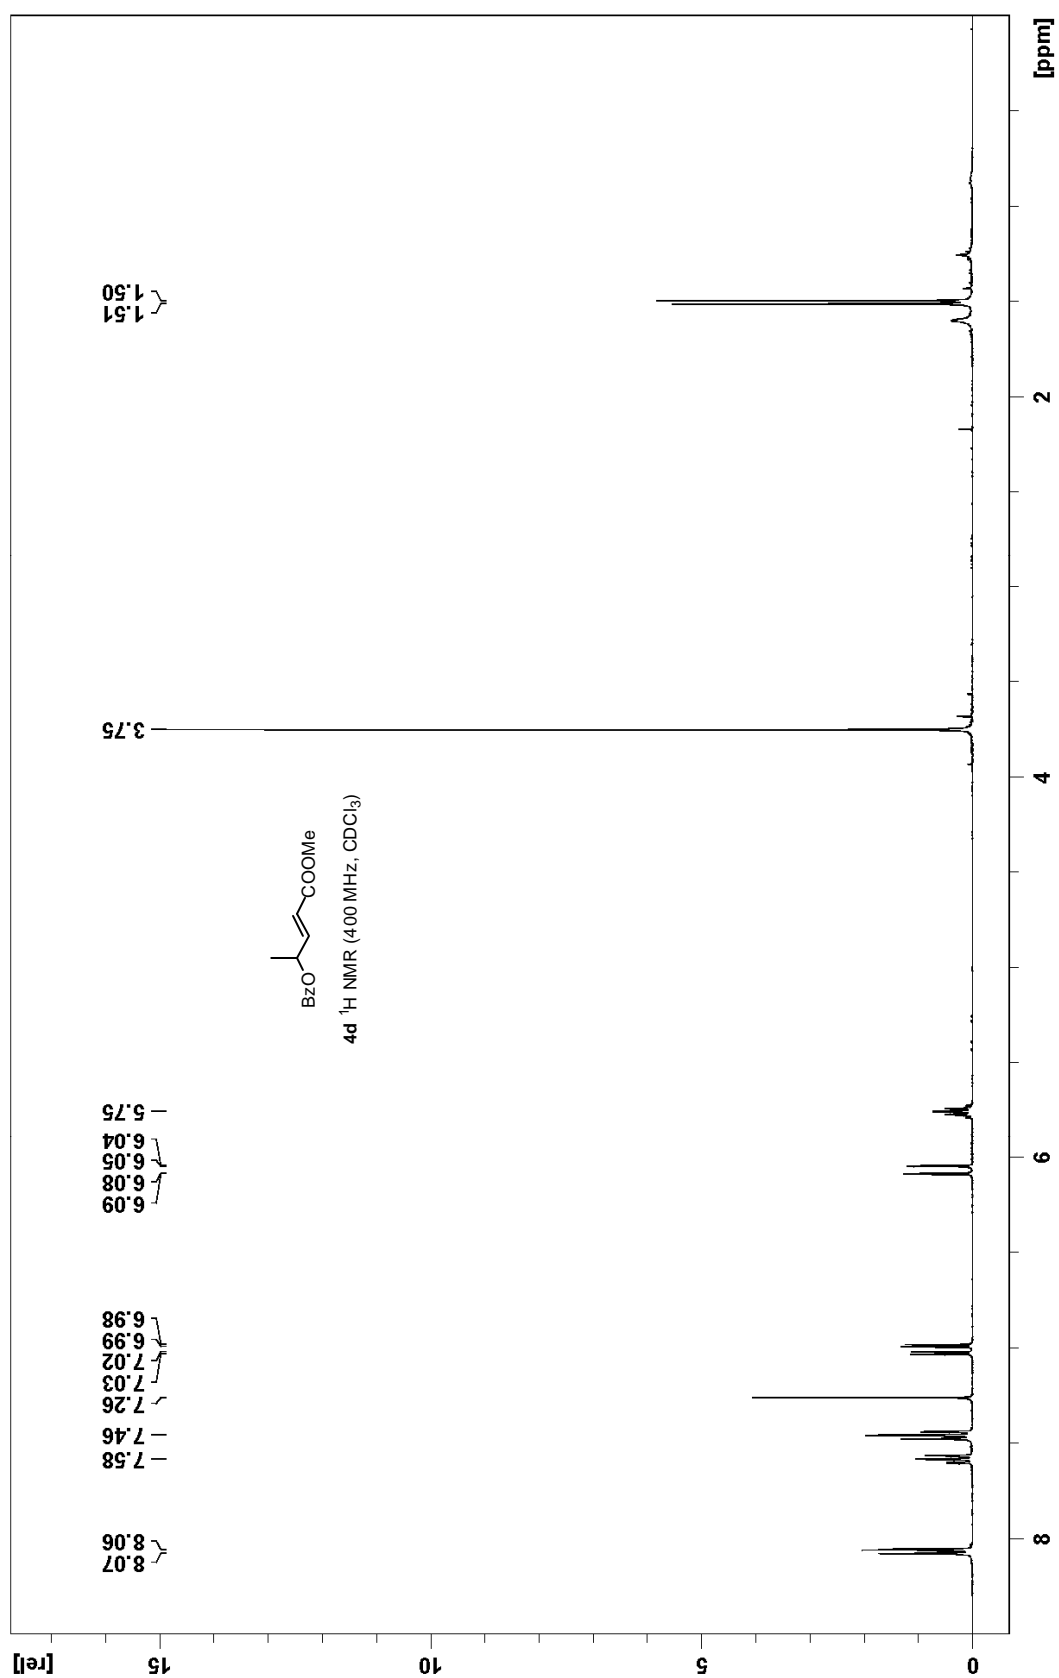

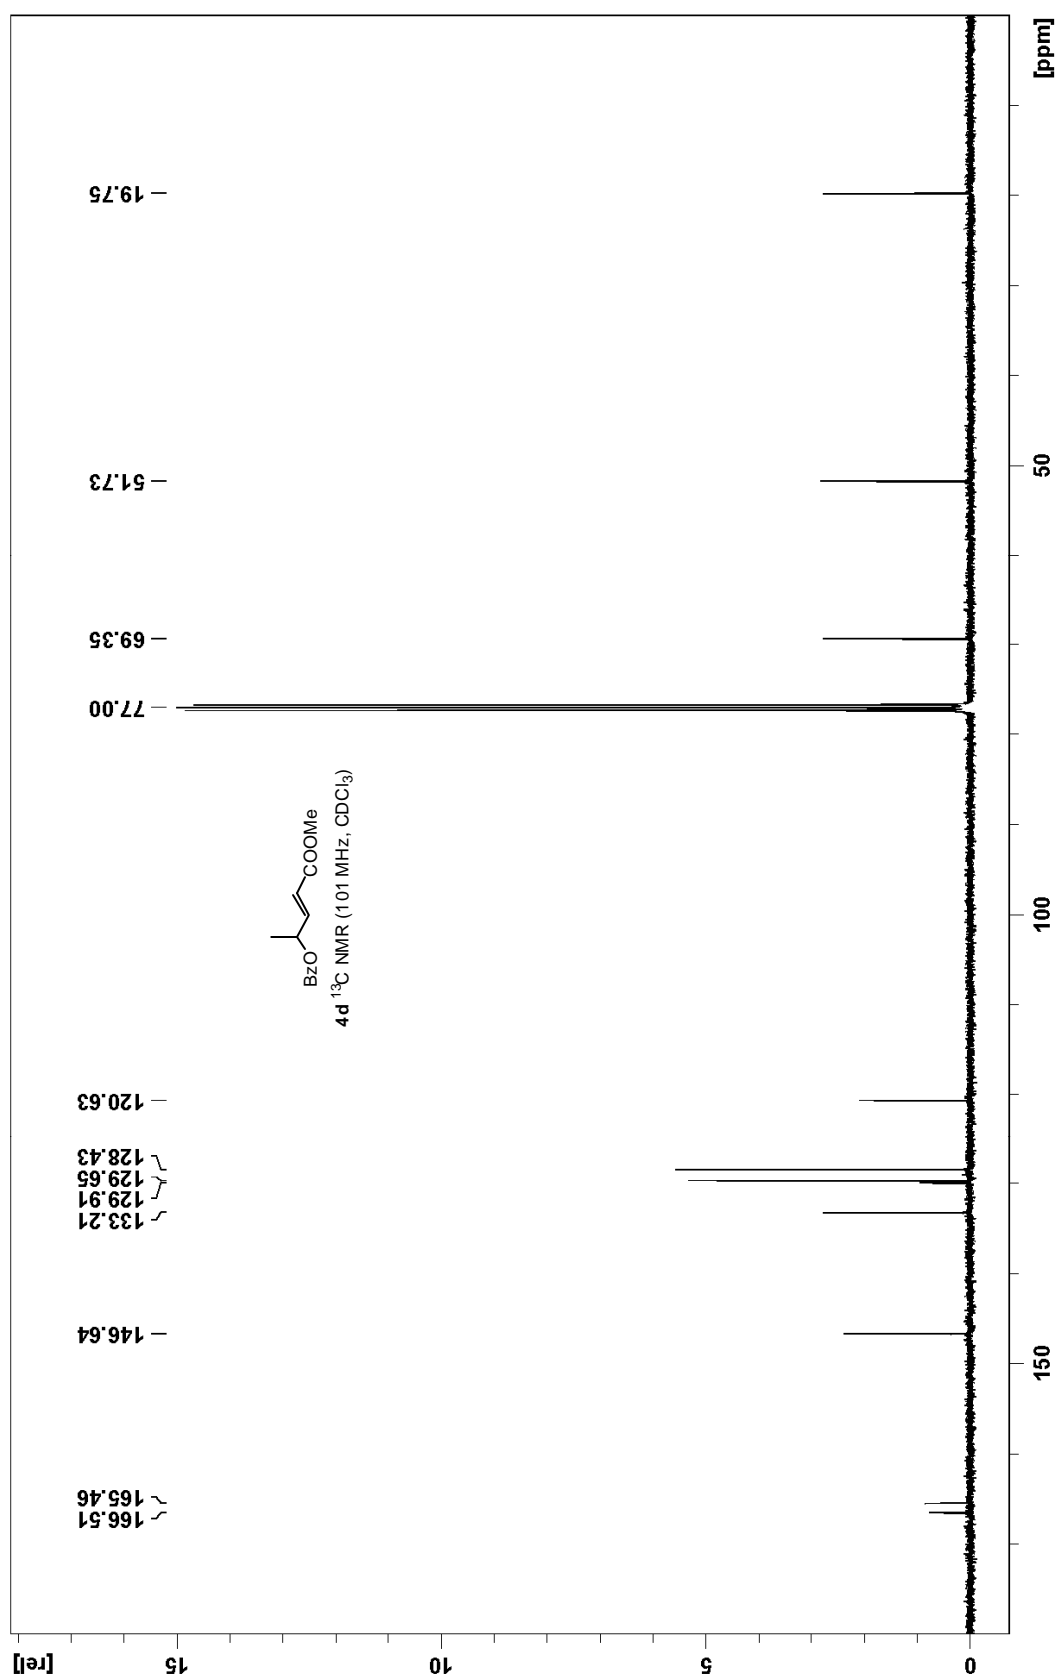

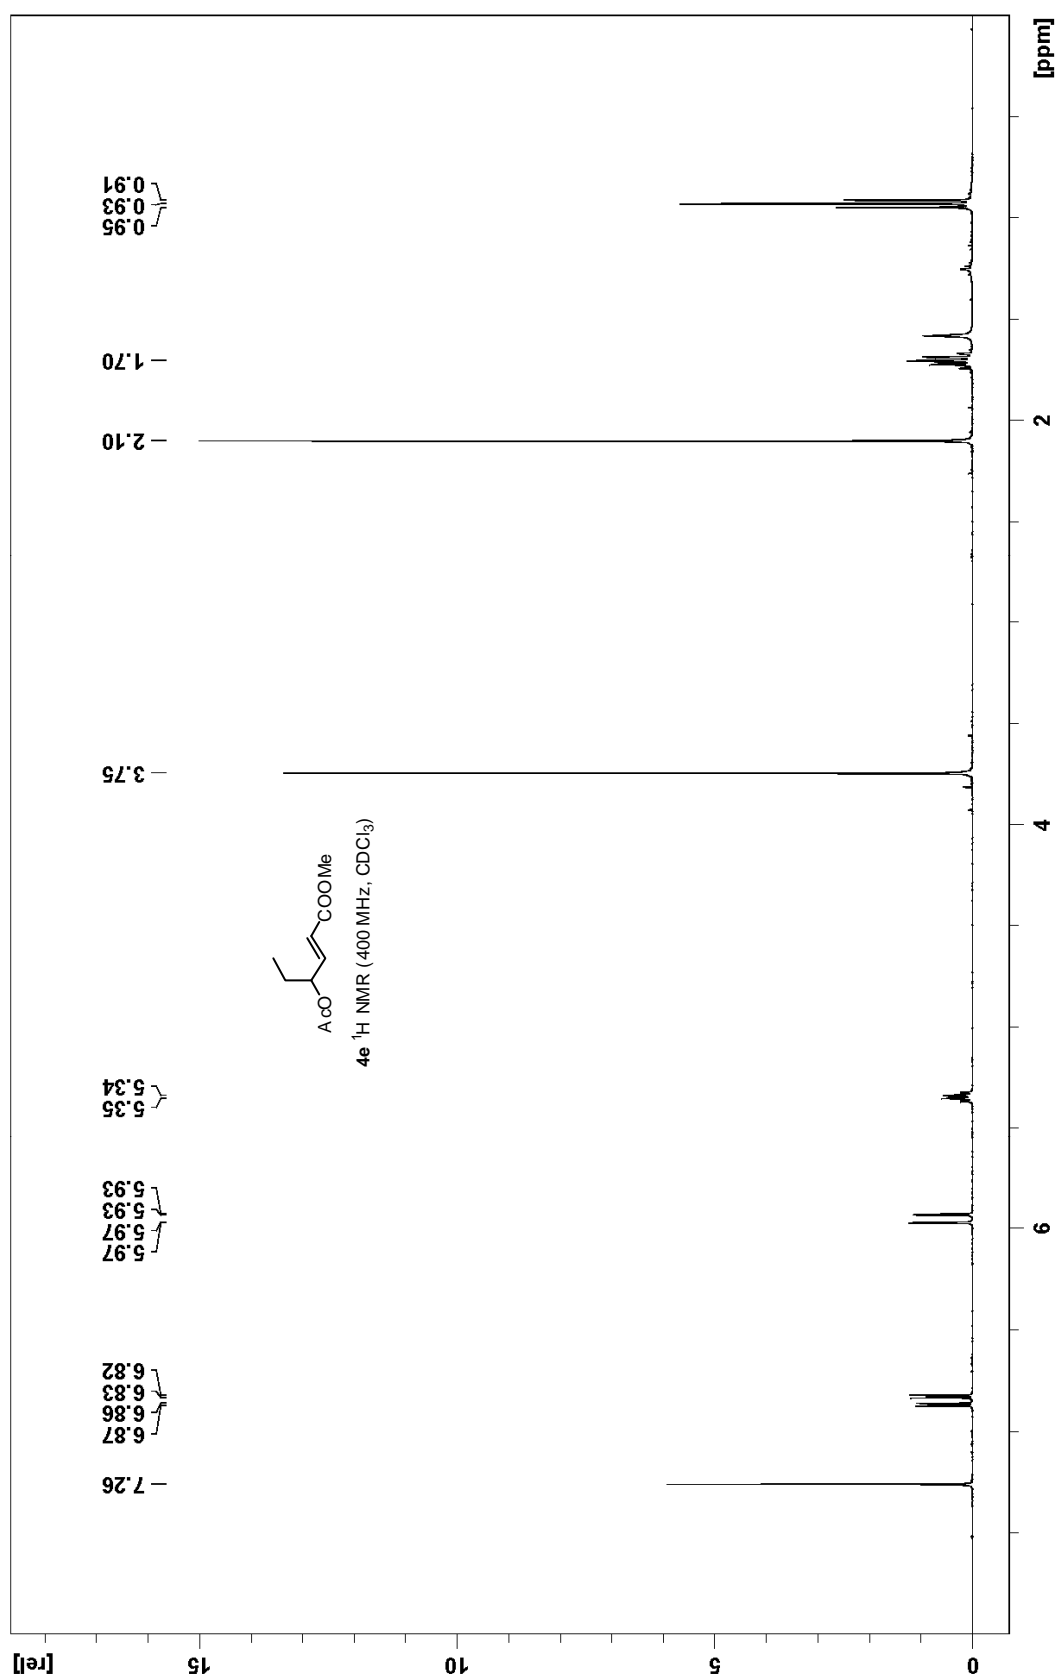

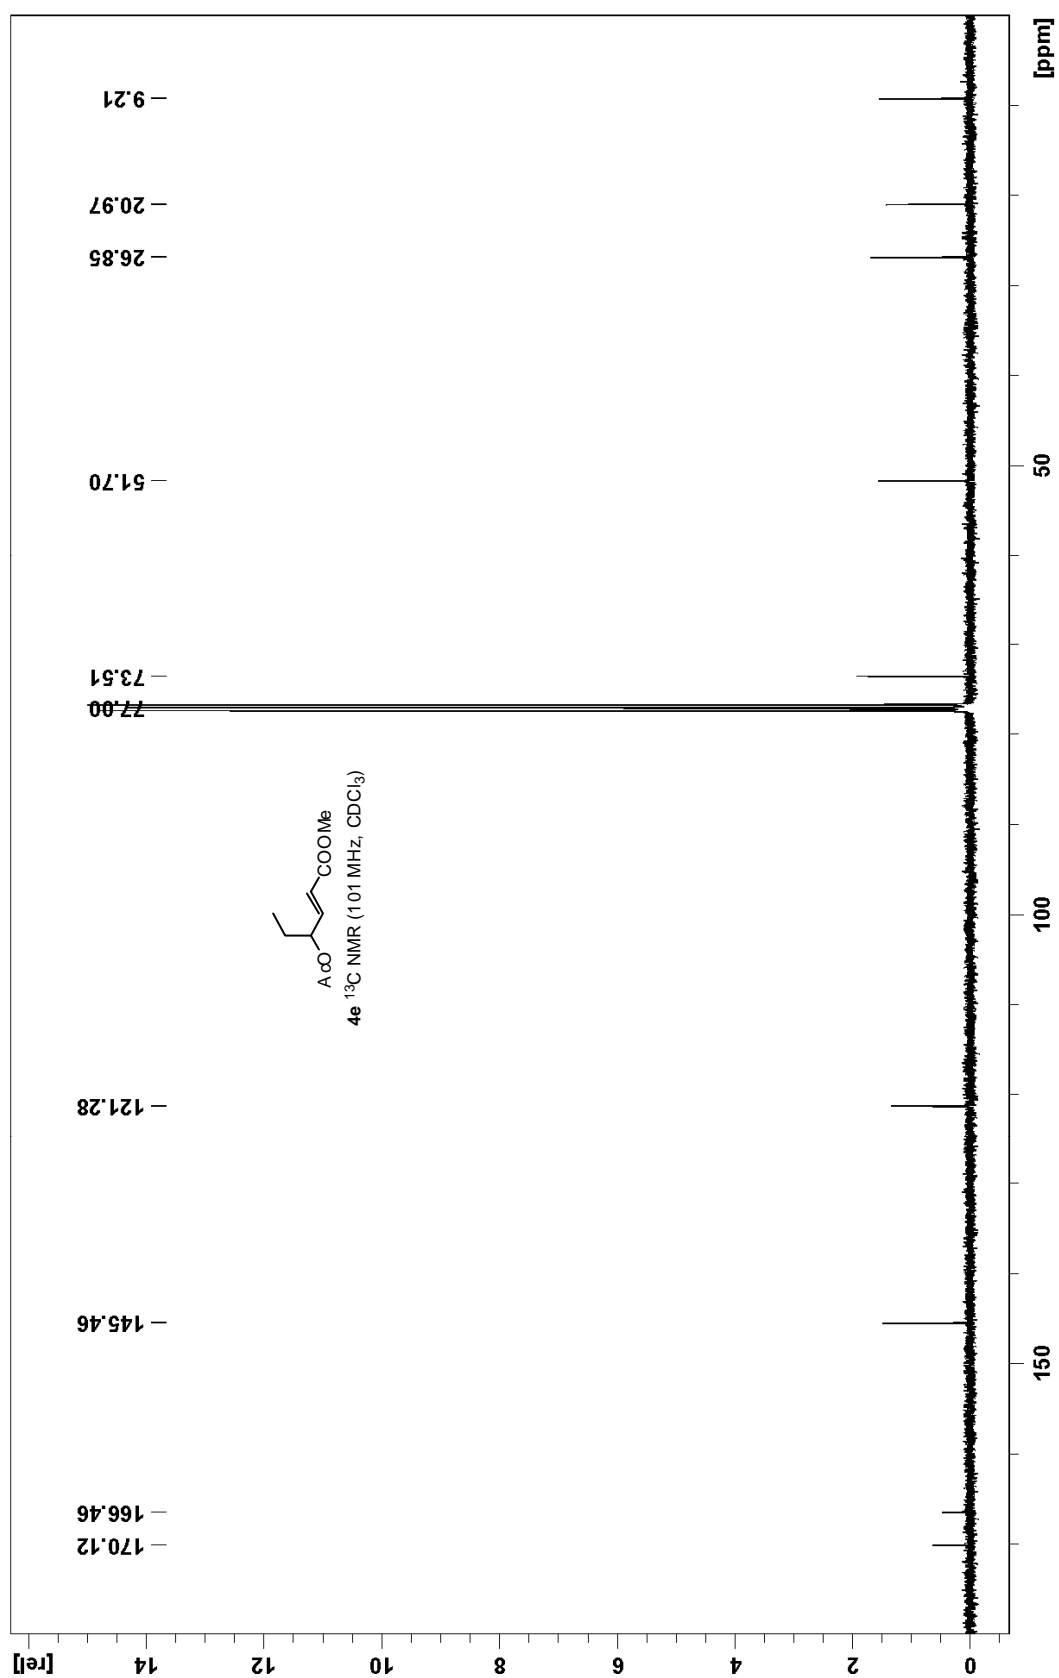

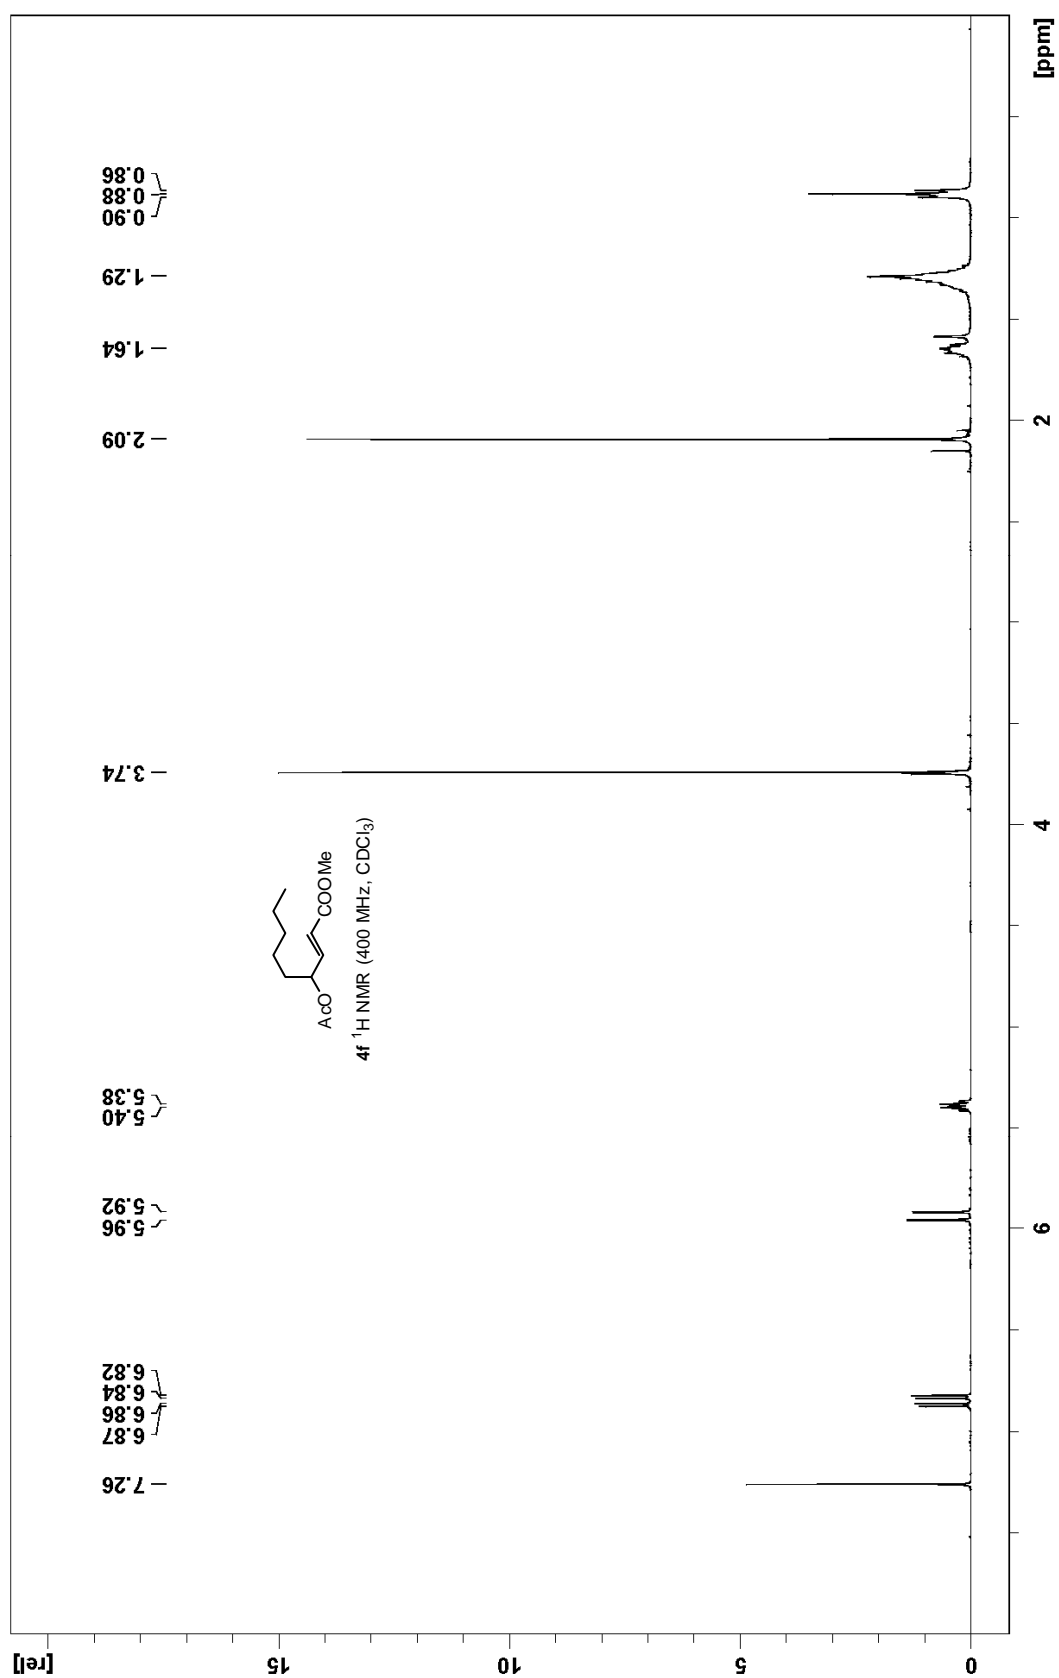

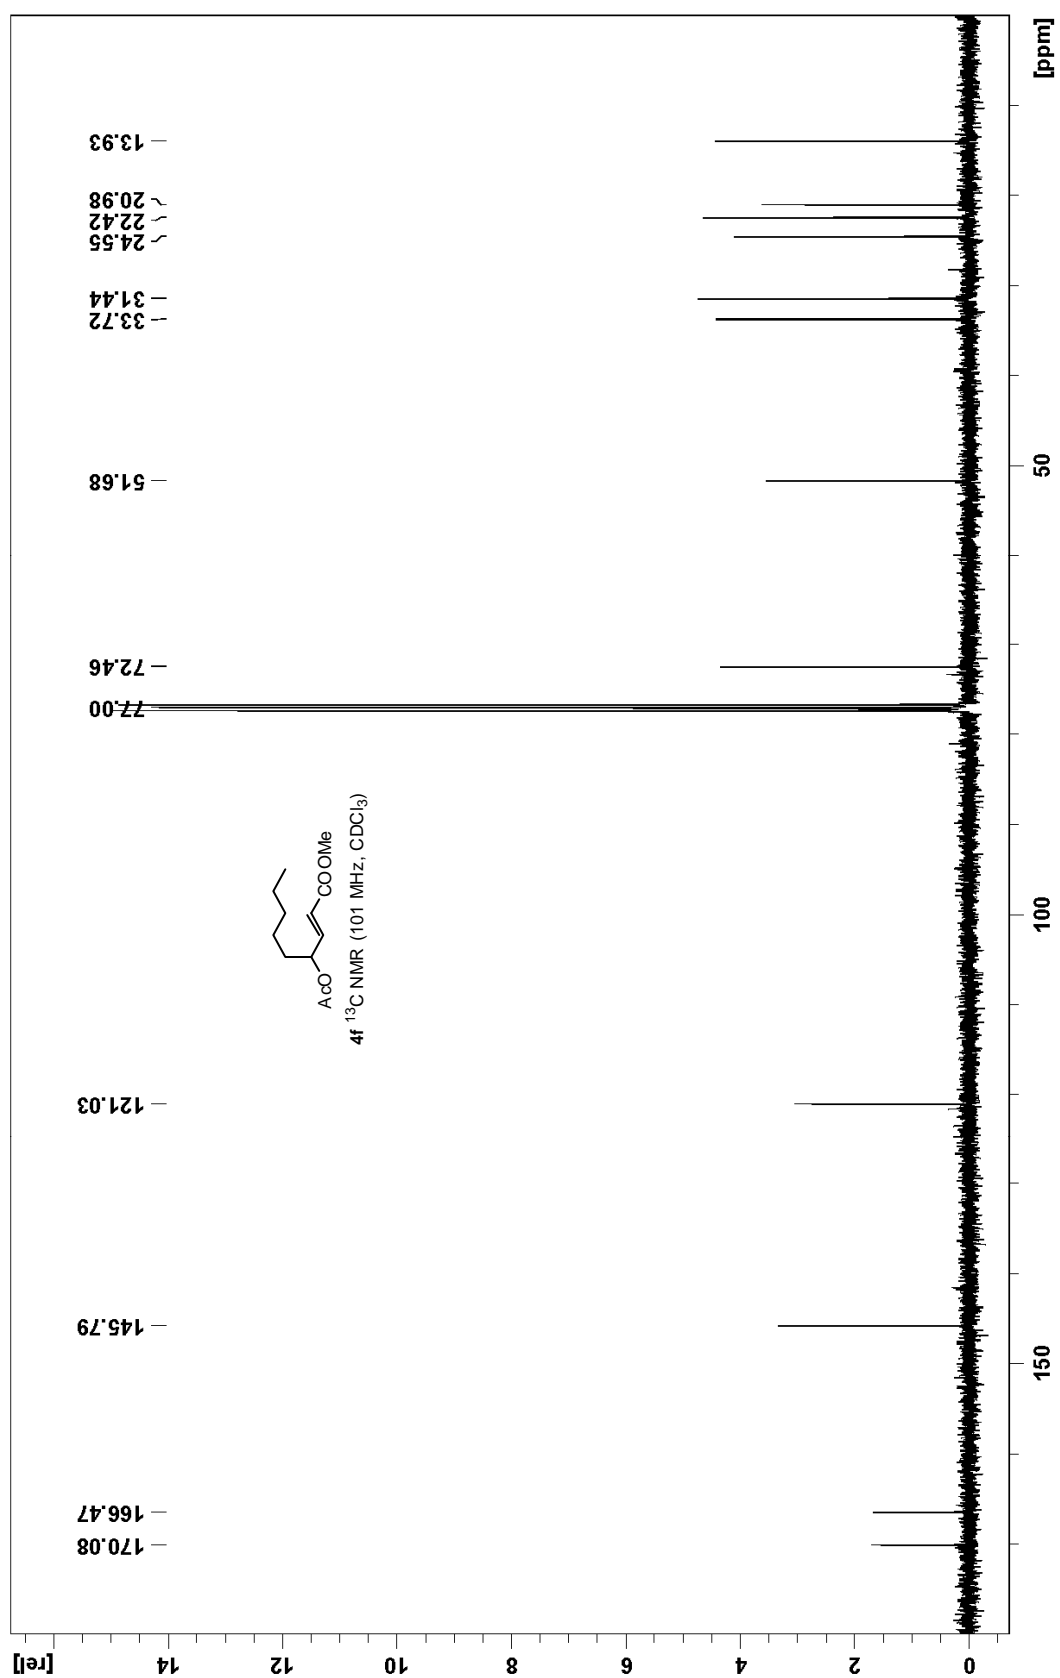

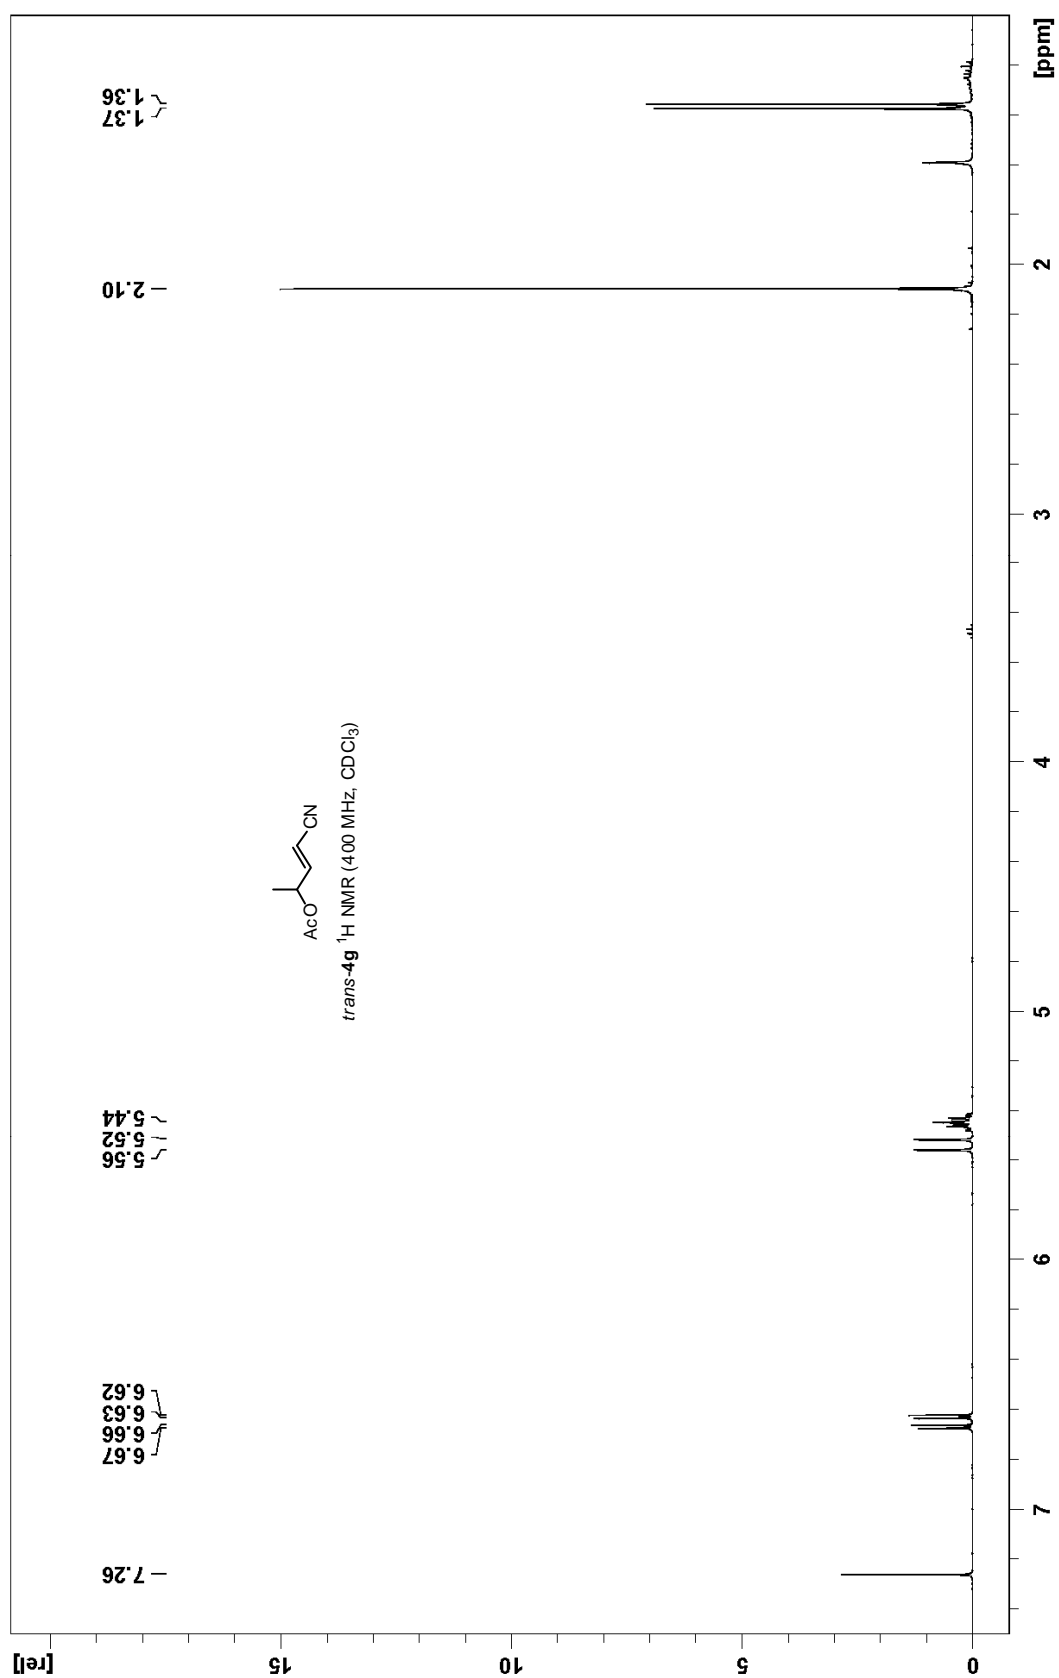

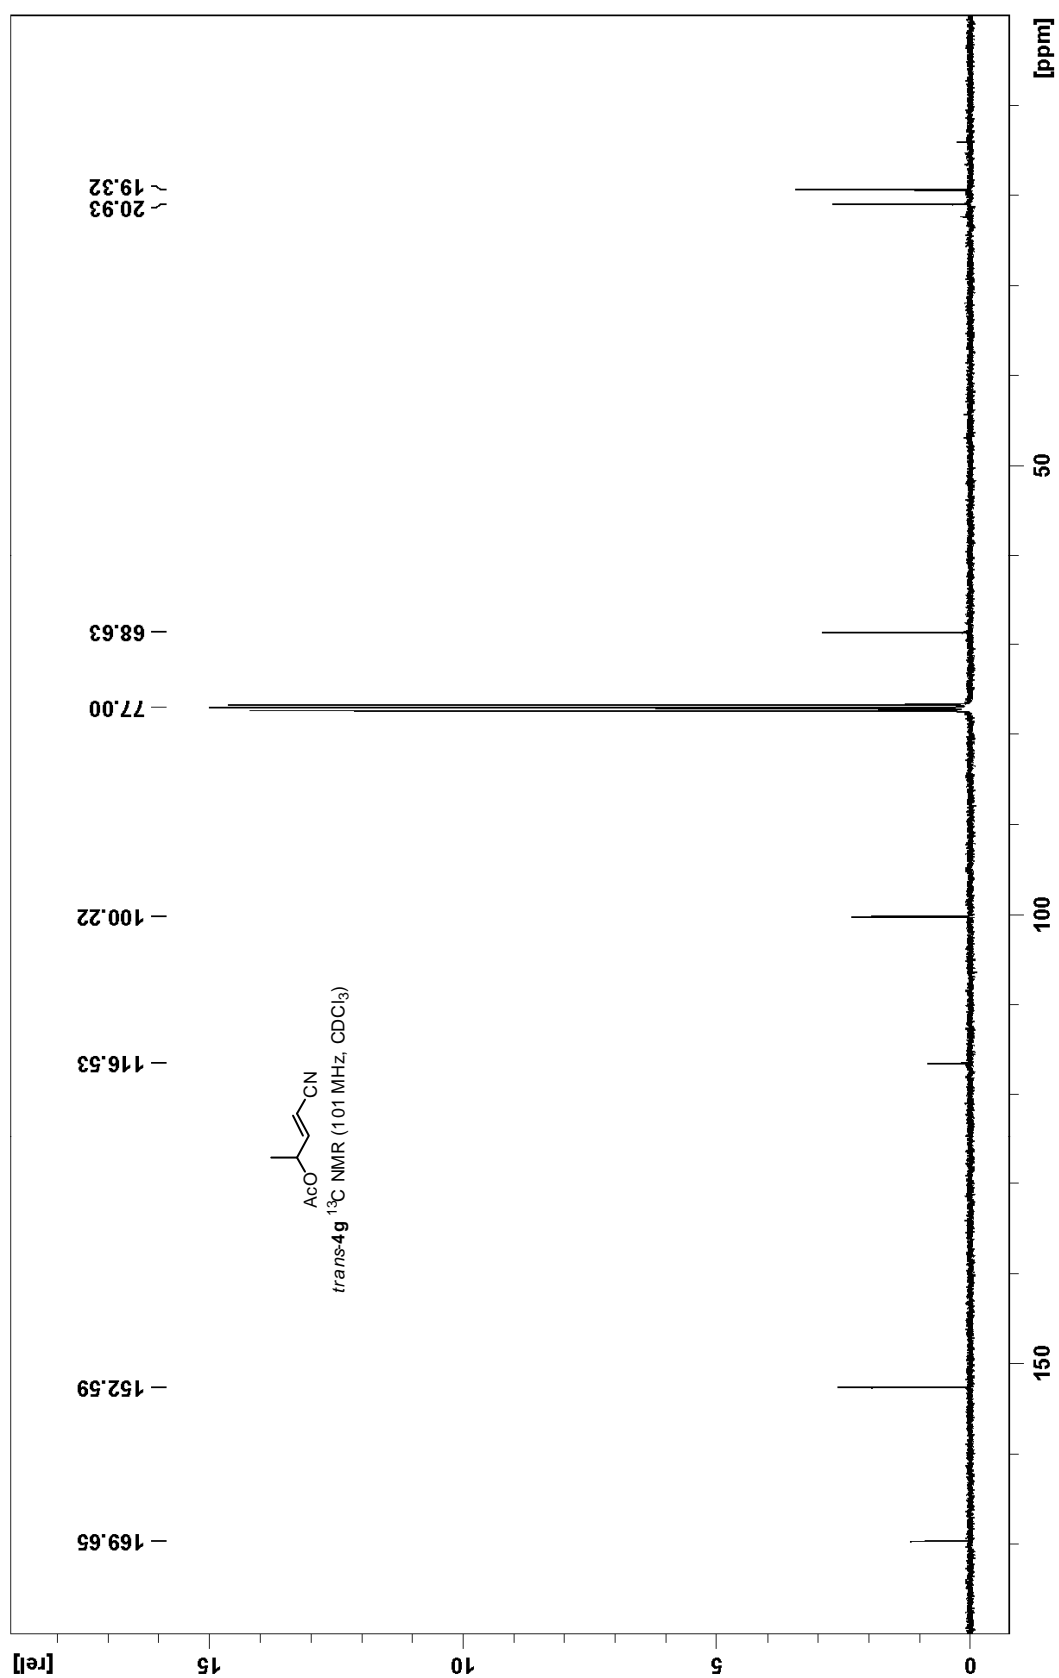



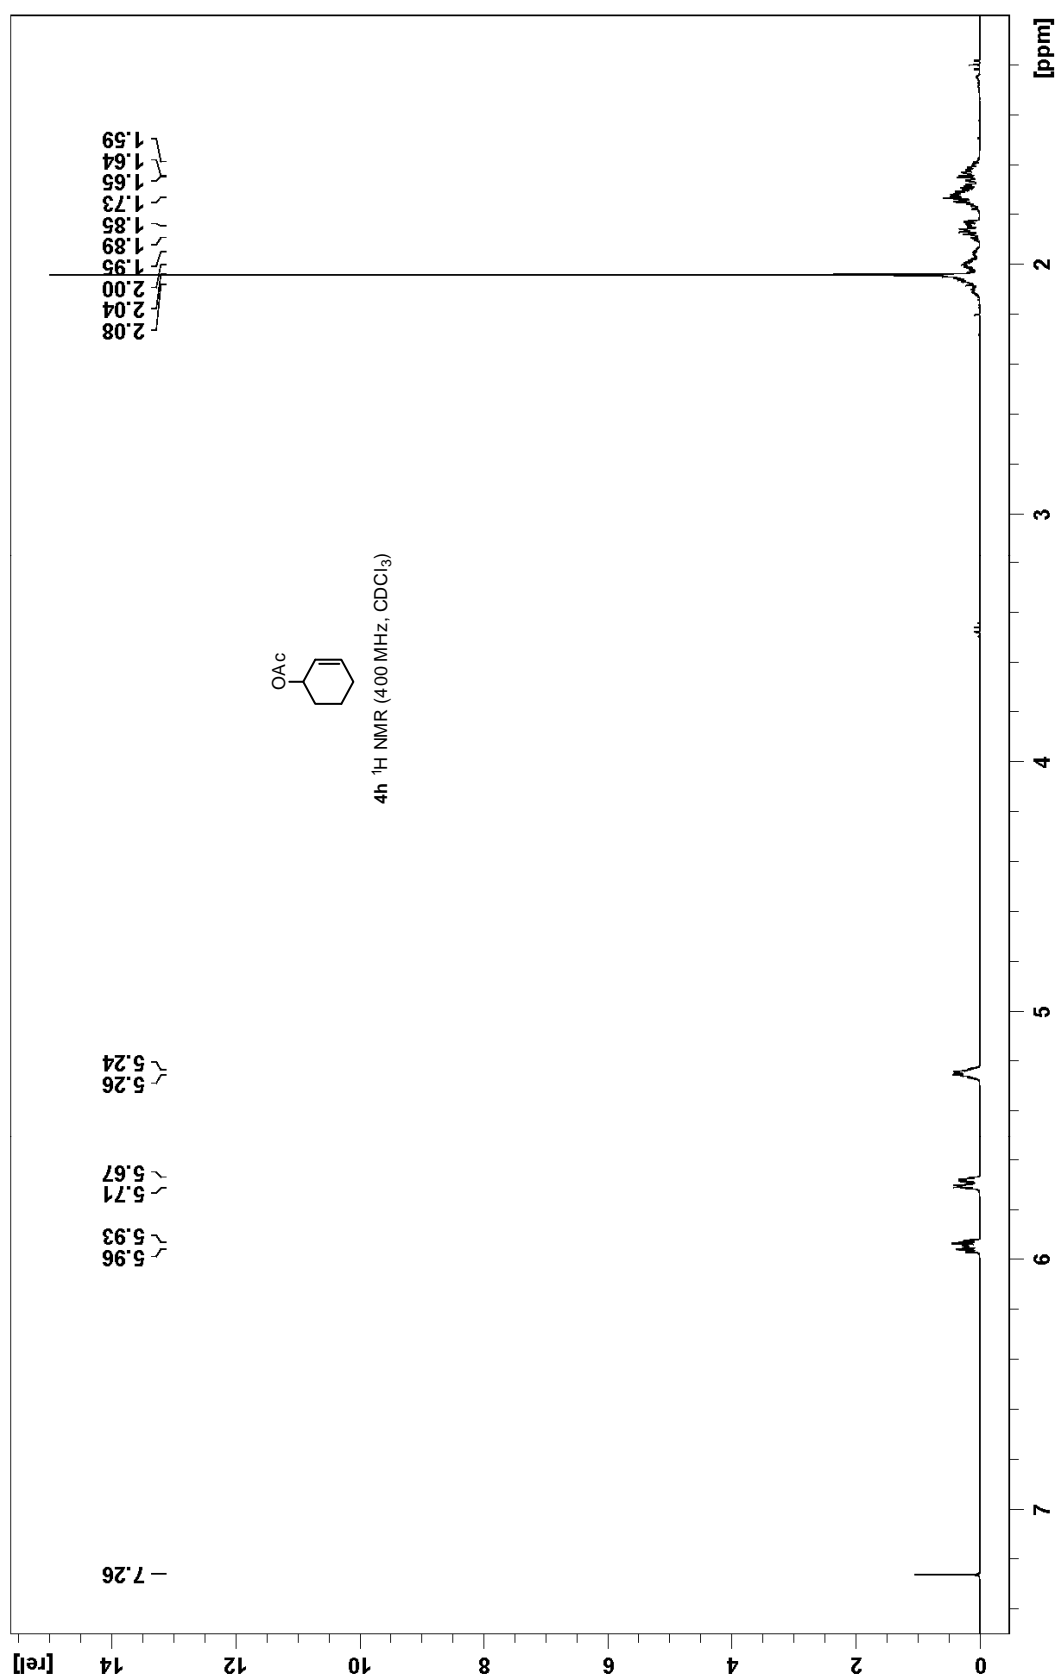

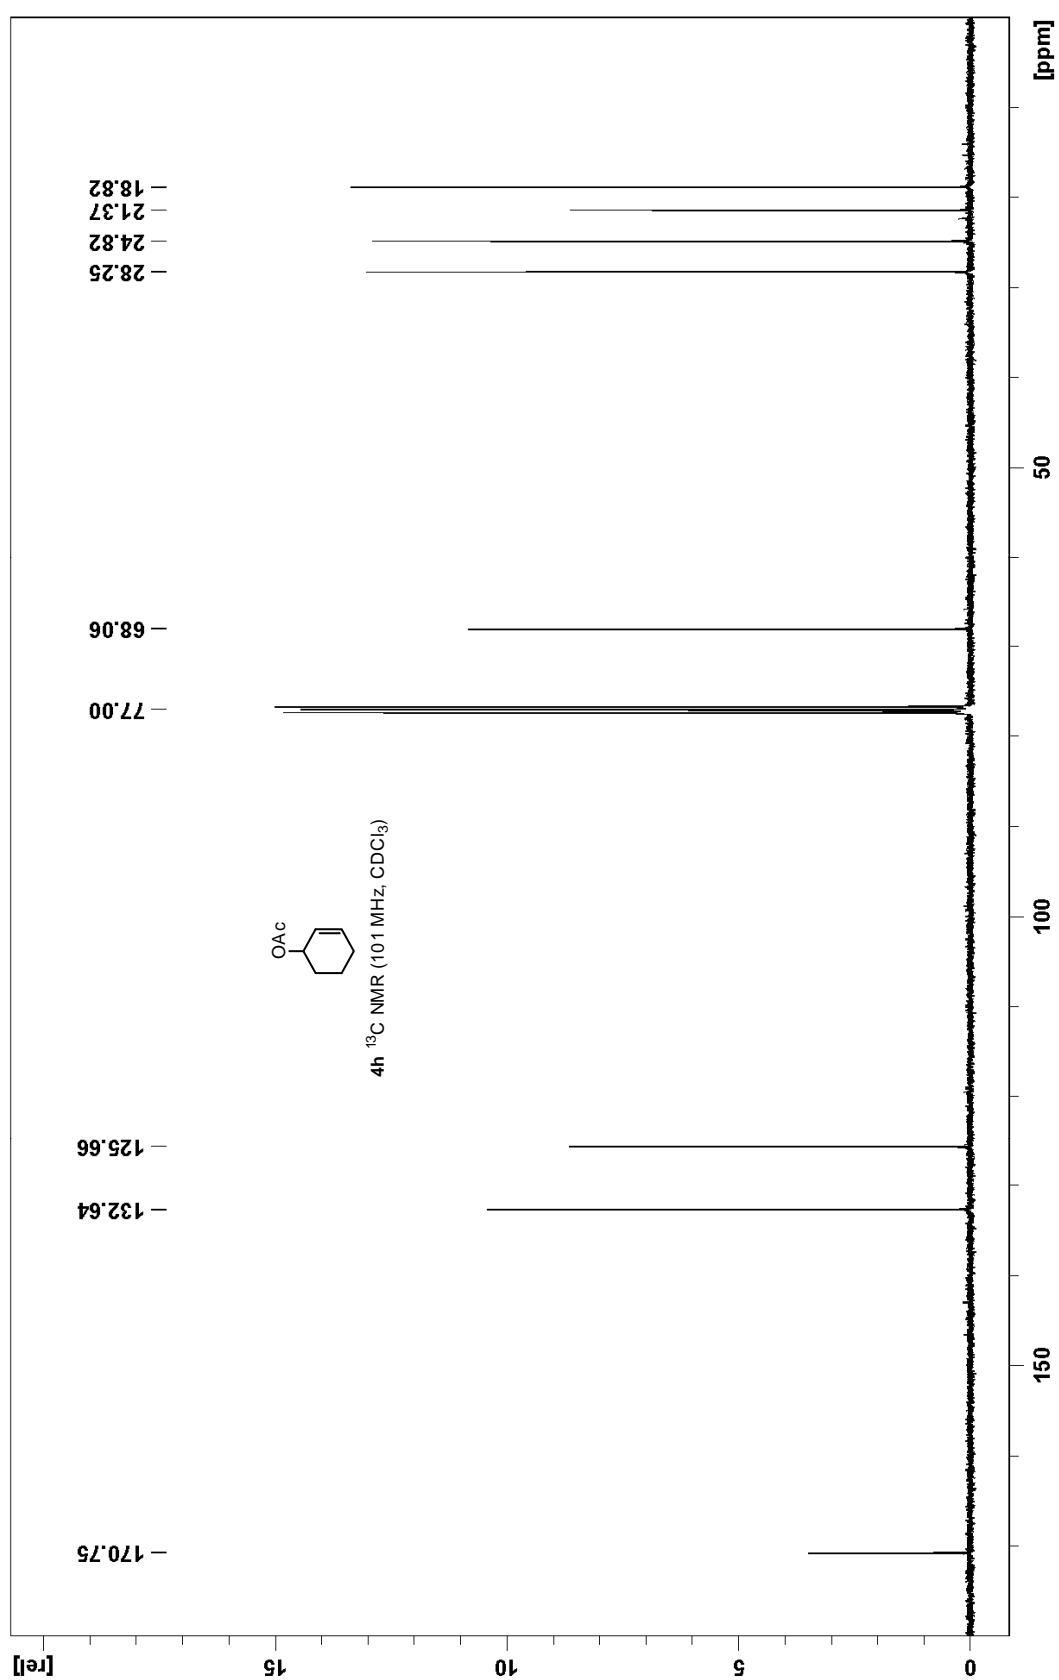

Supplement: Supplementary file 1 [file 4503397]
